# Supplementary material for: Efficient solid-phase synthesis and structural characterization of segetalins A–H, J and K
Source: publisher site journal article supplement (doi:10.3762/bjoc.21.202), 2025-11-27
Supplement: Additional file 1 [file 1860-5397-21-202-S1.pdf]

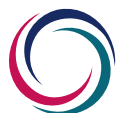

## Supporting Information

for

### Efficient solid-phase synthesis and structural characterization of segetalins A–H, J and K

Liangyu Liu, Wanqiu Lu, Quanping Guo and Zhaoqing Xu

*Beilstein J. Org. Chem.* **2025**, 21, 2612–2617. doi:10.3762/bjoc.21.202

### Experimental section, characterization and copies of spectra

## Table of contents

|                                                                            |     |
|----------------------------------------------------------------------------|-----|
| 1. General information.....                                                | S2  |
| 2. Cyclopeptide synthesis.....                                             | S2  |
| 2.1 General procedure for solid phase peptide synthesis .....              | S2  |
| 2.2 General procedure for synthesizing cyclic peptides .....               | S4  |
| 3. Far UV CD (ultraviolet circular dichroism) assay .....                  | S4  |
| 3.1 General procedure for CD.....                                          | S4  |
| 3.2 Analysis of the CD spectra revealed distinct structural features. .... | S5  |
| 4. Characterization of products .....                                      | S6  |
| 5. NMR spectra of products.....                                            | S19 |

## 1. General information

All commercially available reagents were used without further purification unless otherwise stated. All solvents were purified and dried according to standard methods prior to use.  $^1\text{H}$  and  $^{13}\text{C}$  NMR spectra were acquired on Bruker AVANCE NEO 600 MHz and 400 MHz liquid-state NMR spectrometers using  $\text{CD}_3\text{OD}$ ,  $\text{DMSO}-d_6$ ,  $\text{D}_2\text{O}$ , or  $\text{CD}_3\text{CN}$  as solvents, unless otherwise specified. Data for  $^1\text{H}$  NMR are recorded as follows: chemical shift ( $\delta$ , ppm), multiplicity (s = singlet, d = doublet, t = triplet, m = multiplet, q = quartet, dd = doublet of doublets, dt = doublet of triplets, td = triplet of doublets, and brs = broad signal, and coupling constant(s) in Hz integration). Data for  $^{13}\text{C}$  NMR is reported in terms of chemical shift ( $\delta$ , ppm). All new compounds were further characterized by high resolution mass spectra (HRMS, ESI source, Bruker MaXis 4G). Semi-preparative HPLC was performed on Hanbon Sci.& Tech. HPLC analysis was performed on Tongwei EasySep®-3030. CD was performed on a CY-1700 CD spectrometer.

## 2. Cyclopeptide synthesis

### 2.1 General procedure for solid-phase peptide synthesis

Solid-phase synthesis of linear peptides (taking the linear segetalin A peptide with the sequence N-Gly-Val-Pro-Val-Trp-Ala-C as an example): synthesized using standard Fmoc solid-phase peptide synthesis (SPPS) technology, all peptide synthesis reactions were carried out at a 4 mmol scale, and the amino acids used were commercially available Fmoc-protected amino acids.

a) Resin swelling: In a dry weighing chamber, weigh out dry dichloro resin (Dichloro Resin, 0.703 mmol/g, 4 mmol scale) and transfer it into a 250 mL synthesis vessel. Add approximately 20 mL of dichloromethane, then agitate for 20–30 minutes to swell the resin. Upon completion of swelling, remove the solvent by vacuum filtration.

b) Loading of the first amino acid: In a dry plastic tube, add Fmoc-L-amino acid (16 mmol, 4 equiv) and dissolve it in approximately 20 mL of dichloromethane. Add DIPEA (24 mmol, 6 equiv), shake to mix uniformly, and transfer the solution into the synthesis vessel. Rinse the plastic tube with dichloromethane and add the rinse solution to the synthesis vessel. Stir the reaction mixture for 1 hour.

c) Capping of unreacted resin sites: Add 5 mL of anhydrous methanol solution, stir for 20 minutes, then remove the solvent by vacuum filtration.

- d) Ninhydrin test: Wash the resin with *N,N*-dimethylformamide (DMF, 3 × 5 minutes), and aspirate to dryness after completion. Following the second wash, transfer a small amount of resin into a clean test tube, add ninhydrin detection reagent to verify the successful loading of the first amino acid. A successful coupling is indicated by the resin remaining colorless after heating in a water bath for 1–2 minutes.
- e) Fmoc deprotection: Add approximately 20 mL of deprotection reagent (1% piperidine + 1% DBU in DMF) to the synthesis vessel and conduct three rounds of deprotection reactions, each followed by solvent aspiration. React for 5 min, 5 min, and 10 min sequentially. Wash the resin with DMF (3 × 5 min), aspirating the solvent after each wash. After the second DMF wash, transfer a small aliquot of resin to a clean test tube and add ninhydrin reagent to confirm successful Fmoc removal. A positive test (blue color development after heating in a water bath for 1–2 min) indicates complete deprotection.
- f) Coupling of the second amino acid: In a dry plastic tube, combine Fmoc-L-amino acid (12 mmol, 3 equiv), HBTU (12 mmol, 3 equiv), and HOBt (12 mmol, 3 equiv). Dissolve the mixture in approximately 20 mL of DMF, then add DIPEA (24 mmol, 6 equiv). After thorough mixing, transfer the solution to the synthesis vessel, rinsing the plastic tube with DMF to ensure complete transfer. Stir the reaction mixture for 1 hour, then remove the solvent by vacuum filtration.
- g) Coupling of remaining amino acids: Repeat steps d–f sequentially for each subsequent amino acid until the full peptide sequence is assembled. After completing the final coupling step, perform Fmoc deprotection on the *N*-terminus of the last amino acid to expose the free amine group for downstream applications.
- h) Resin drying: Sequentially add approximately 20 mL of dichloromethane (2 × 3 minutes) and methanol (2 × 3 minutes) to the synthesis vessel for washing. After completion, aspirate thoroughly until the resin is dried to a powdery state.
- i) Peptide cleavage: Add approximately 50 mL of cleavage cocktail (1% TFA in DCM) to the synthesis vessel and stir for 1.5 hours. Collect the filtrate containing the cleaved peptide. Repeat the cleavage process twice more using fresh cleavage cocktail (2 × 10 minutes), combining all filtrates. The reaction mixture was concentrated, and precipitated out by the addition of cold ethyl ether to obtain the crude product.

## 2.2 General procedure for synthesizing cyclic peptides

a) Liquid-phase cyclization: In a dry 500 mL round-bottomed flask equipped with a magnetic stirring bar, combine the crude linear peptide from the previous step (0.3 mmol, 1 equiv) and PyBOP (0.6 mmol, 2 equiv). Dissolve the solids in 300 mL of anhydrous DMF. With vigorous stirring, slowly add DIPEA (0.9 mmol, 3 equiv) dropwise via syringe. Allow the reaction to proceed at room temperature overnight under nitrogen atmosphere. Following completion, remove DMF under reduced pressure using a rotary evaporator.

b) Side-chain deprotection: Add approximately 50 mL of cleavage cocktail (TFA/DCM 1:1) or TFA/TIS/H<sub>2</sub>O 95:2.5:2.5) directly to the round-bottomed flask containing the cyclized peptide. Stir the reaction mixture at room temperature for 1.5 hours to remove all acid-labile side-chain protecting groups. Following deprotection, concentrate the mixture under reduced pressure using a rotary evaporator. Precipitate the crude peptide by slowly adding ice-cold diethyl ether. Collect the precipitate by filtration or centrifugation to obtain the crude cyclic peptide product.

c) The crude product was purified by semi-HPLC using acetonitrile/H<sub>2</sub>O as the gradient elution (Hanbon Sci.& Tech (Dubhe, C18, 10  $\mu$ , 100 Å), length 20 mm  $\times$  250 mm, 5–75% CH<sub>3</sub>CN/H<sub>2</sub>O + 0.1% trifluoroacetic acid). The purity of all peptides was determined by HPLC analysis (Waters e2695 (BEH, C18, 10  $\mu$ , 130 Å), length 4.6 mm  $\times$  250 mm, 5–95% CH<sub>3</sub>CN/H<sub>2</sub>O + 0.1% trifluoroacetic acid). The pure peptides were obtained as a compound after lyophilization.

## 3. Far UV CD (ultraviolet circular dichroism) assay

### 3.1 General procedure for CD

A JASCO J-1500 CD Spectropolarimeter was employed to perform Far UV CD analysis at 25 °C. Samples of 0.1–0.3 mg/mL were reconstituted in aqueous buffer (0.01  $\times$  PBS), deionized H<sub>2</sub>O, and 30% TFE. Far UV CD spectra were collected from 195 nm to 260 nm on a 0.1 cm path length cuvette at a data pitch of 0.5 nm, bandwidth of 1.0 nm, and a scan speed of 50 nm/min. PBS buffer was used to perform blank correction. Equation  $[\theta] = (M \times 0.001 \times \theta) / (c \times N)$ , where  $c$  is the sample concentration (mg/mL),  $N$  is the number of amino acids,  $\theta$  is the measured ellipticity (mdeg) was used to calculate molar ellipticity.

### 3.2 Analysis of the CD spectra revealed distinct structural features

**Table S1:** The CD secondary structure and features of **1–10**.

| Segetalins | Solvent          | Secondary structure tendency (preliminary inference) | Key CD features                                                                       |
|------------|------------------|------------------------------------------------------|---------------------------------------------------------------------------------------|
| 1          | 0.01×PBS         | β-turn/β-sheet (partial α-helix fragments)           | positive peak at ≈200 nm + negative peak at ≈220 nm; weak double minima at 208/222 nm |
|            | H <sub>2</sub> O | β-turn/β-sheet (weakened, random coil increased)     | broadened peaks at 200/220 nm; reduced peak intensity                                 |
|            | 30% TFE          | α-helix enhanced (clear double minima)               | sharp double negative peaks at 208/222 nm                                             |
| 2          | 0.01×PBS         | β-sheet (pronounced)/random coil (flat spectra)      | single negative peak at ≈217 nm; flat baseline → random coil                          |
|            | H <sub>2</sub> O | β-sheet (broadened)/random coil (reduced intensity)  | 217 nm peak widened; intensity decreased by ≈30% vs PBS                               |
|            | 30% TFE          | α-helix (induced)/β-sheet (strengthened)             | new double minima at 208/222 nm; enhanced 217 nm peak (if β-sheet dominant)           |
| 3          | PBS              | α-helix (weak)/β-sheet (possible)                    | faint double minima at 208/222 nm; 217 nm shoulder                                    |
|            | H <sub>2</sub> O | random coil (increased)/α-helix (diminished)         | reduced 208/222 nm signals; flattened baseline                                        |
|            | 30% TFE          | α-helix (strongly enhanced)                          | intense double negative peaks at 208/222 nm                                           |
| 4          | 0.01×PBS         | β-sheet (dominant)                                   | strong 217 nm negative peak                                                           |
|            | H <sub>2</sub> O | β-sheet (weakened)/random coil                       | 217 nm peak intensity reduced by 40%                                                  |
|            | 30% TFE          | β-sheet (strengthened)                               | 217 nm peak                                                                           |
| 5          | 0.01×PBS         | α-helix + β-sheet (mixed)                            | double minima at 208/222 nm + 217 nm peak                                             |
|            | H <sub>2</sub> O | random coil (major)/residual structures              | weakened peaks; no dominant features                                                  |
|            | 30% TFE          | α-helix (predominant)                                | prominent 208/222 nm double minima                                                    |
| 6          | 0.01×PBS         | α-helix (moderate)                                   | clear double minima at 208/222 nm                                                     |
|            | H <sub>2</sub> O | α-helix (weakened)/random coil                       | reduced intensity of 208/222 nm peaks                                                 |
|            | 30% TFE          | α-helix (highly stable)                              | sharp, intense double negative peaks at 208/222 nm                                    |

|    |                  |                                               |                                                                       |
|----|------------------|-----------------------------------------------|-----------------------------------------------------------------------|
| 7  | 0.01×PBS         | β-sheet (moderate)/random coil (weak signals) | 217 nm negative peak (medium intensity); faint features → random coil |
|    | H <sub>2</sub> O | random coil (dominant)/residual β-sheet       | 217 nm peak flattened; mostly flat baseline                           |
|    | 30% TFE          | β-sheet (markedly strengthened)               | intense negative peak at 217 nm                                       |
| 8  | 0.01×PBS         | random coil (main)/β-sheet (trace)            | flat spectra; weak 217 nm shoulder                                    |
|    | H <sub>2</sub> O | random coil (exclusive)                       | no distinct peaks; smooth baseline                                    |
|    | 30% TFE          | α-helix (weakly induced)                      | shallow double minima at 208/222 nm                                   |
| 9  | 0.01×PBS         | β-sheet/α-helix (minor)                       | 217 nm peak + faint 208/222 nm minima                                 |
|    | H <sub>2</sub> O | random coil (significant)/β-sheet (residual)  | 217 nm peak broadened; low intensity                                  |
|    | 30% TFE          | α-helix (induced)                             | new double minima at 208/222 nm (strong intensity)                    |
| 10 | 0.01×PBS         | β-sheet (strong)                              | sharp negative peak at 217 nm                                         |
|    | H <sub>2</sub> O | β-sheet (retained)/random coil (minor)        | 217 nm peak preserved (slight broadening)                             |
|    | 30% TFE          | α-helix + β-sheet (mixed)                     | double minima at 208/222 nm + 217 nm negative peak                    |

#### 4. Characterization of products

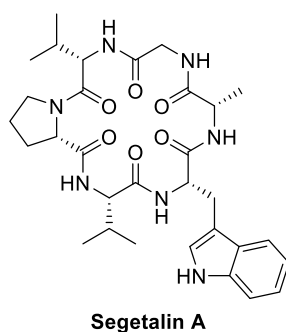

##### **Cyclo-[Gly-Val-Pro-Val-Trp-Ala] (segetalin A):**

**<sup>1</sup>H NMR (400 MHz, DMSO-*d*<sub>6</sub>)** δ 10.91 (s, 1H), 9.00 (d, *J* = 6.8 Hz, 1H), 7.55 (d, *J* = 8.0 Hz, 1H), 7.47 (t, *J* = 5.2 Hz, 1H), 7.42 (d, *J* = 9.2 Hz, 1H), 7.33 (t, *J* = 8.0 Hz, 2H), 7.15 (d, *J* = 2.0 Hz, 1H), 7.08 (q, *J* = 6.8 Hz, 1H), 6.98 (t, *J* = 7.2 Hz, 1H), 4.52 (q, *J* = 4.8 Hz, 1H), 4.35 (d, *J* = 8.0 Hz, 1H), 4.27 (q, *J* = 6.4 Hz, 1H), 4.14 (t, *J* = 10.0 Hz, 1H), 3.72-3.56 (m, 2H), 3.58 (q, *J* = 4.0 Hz, 1H), 3.35

(dd,  $J = 5.6, 16.4$  Hz, 1H), 3.18-3.06 (m, 2H), 1.95-1.88 (m, 2H), 1.69-1.65 (m, 1H), 1.15 (d,  $J = 7.2$  Hz, 3H), 0.96 (d,  $J = 6.8$  Hz, 3H), 0.83 (t,  $J = 6.8$  Hz, 3H), 0.77 (d,  $J = 4.4$  Hz, 3H), 0.76 (d,  $J = 4.4$  Hz, 3H).

**$^{13}\text{C}$  NMR (100 MHz, DMSO- $d_6$ )  $\delta$**  173.60, 173.29, 172.05, 171.61, 171.33, 169.72, 136.58, 127.55, 123.92, 121.62, 118.99, 118.87, 111.84, 109.67, 60.82, 60.41, 56.02, 55.62, 49.98, 47.41, 43.33, 31.81, 30.46, 30.16, 26.50, 21.96, 20.07, 19.70, 19.14, 17.81, 15.94.

**HRMS (ESI)**  $\text{C}_{31}\text{H}_{43}\text{N}_7\text{O}_6$   $[\text{M}+\text{H}]^+$  calcd:610.3348, found:610.3290.

Analytical HPLC of segetalin A

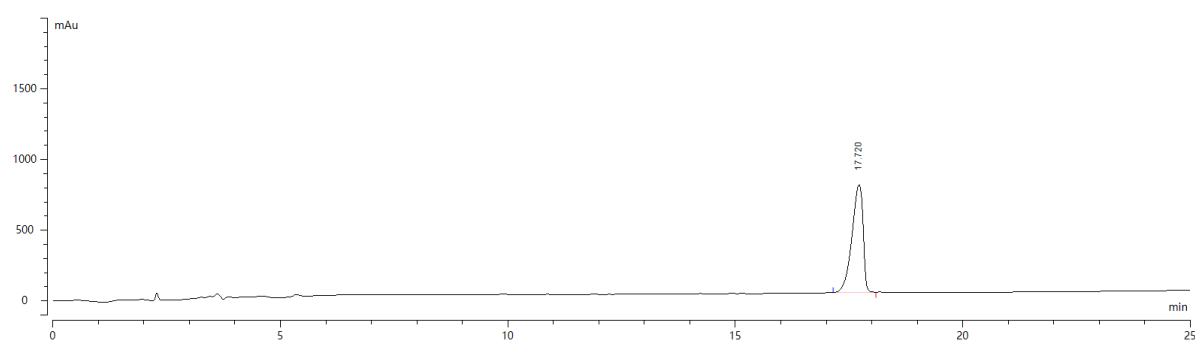

| Compound    | Ret. time (min) | Area (mAu*s) | Area (%) | Height (mAU) |
|-------------|-----------------|--------------|----------|--------------|
| Segetalin A | 17.720          | 12913.889    | 100.000  | 762.374      |

High-resolution MS of segetalin A

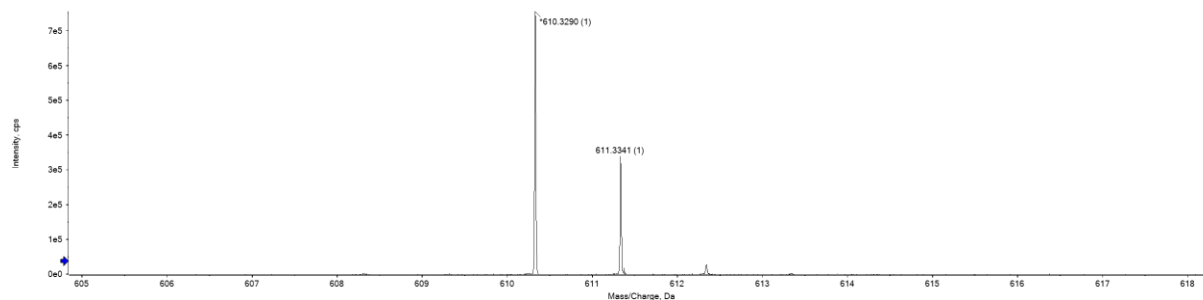



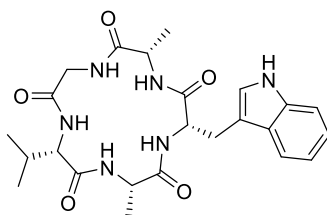

Segetalin B

**Cyclo-[Gly-Val-Ala-Trp-Ala] (segetalin B)**

**<sup>1</sup>H NMR (400 MHz, DMSO-*d*<sub>6</sub>)** δ 10.93 (d, *J* = 1.2 Hz, 1H), 8.50 (t, *J* = 5.6 Hz, 1H), 8.06-8.00 (m, 3H), 7.82 (d, *J* = 8.4 Hz, 1H), 7.61 (d, *J* = 8.0 Hz, 1H), 7.39 (d, *J* = 8.0 Hz, 1H), 7.18 (d, *J* = 1.6 Hz, 2H), 7.12 (t, *J* = 7.2 Hz, 1H), 7.04 (t, *J* = 7.2 Hz, 1H), 4.30-4.26 (m, 2H), 4.19-4.11 (m, 2H), 3.97 (t, *J* = 7.2 Hz, 1H), 3.37 (dd, *J* = 5.2 Hz, 14.4 Hz, 1H), 3.32-3.21 (m, 2H), 2.07-1.99 (m, 1H), 1.28 (dd, *J* = 6.8 Hz, 11.6 Hz, 6H), 0.93 (t, *J* = 6 Hz, 6H).

**<sup>13</sup>C NMR (100 MHz, DMSO-*d*<sub>6</sub>)** δ 172.12, 171.95, 171.60, 170.86, 170.22, 127.78, 124.12, 121.53, 118.88, 118.85, 111.96, 110.53, 60.01, 56.74, 50.19, 48.96, 43.94, 30.20, 26.92, 19.70, 18.57, 17.72, 17.60.

**HRMS (ESI)** C<sub>24</sub>H<sub>32</sub>N<sub>6</sub>O<sub>5</sub> [M+Na]<sup>+</sup> calcd:507.2337, found:507.2326.

Analytical HPLC of segetalin B

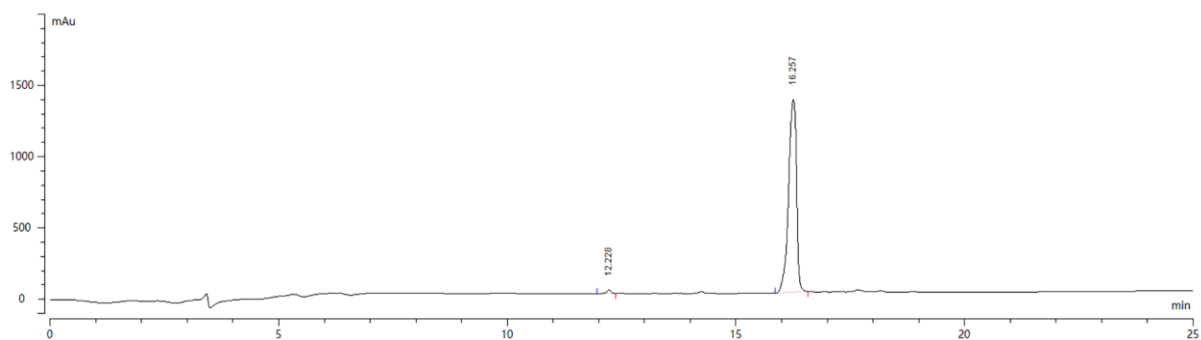

| Compound    | Ret. time (min) | Area (mAu*s) | Area (%) | Height (mAU) |
|-------------|-----------------|--------------|----------|--------------|
| N.A.        | 12.228          | 165.220      | 1.000    | 23.786       |
| Segetalin B | 16.257          | 16354.437    | 99.000   | 1352.468     |

## High-resolution MS of segetalin B

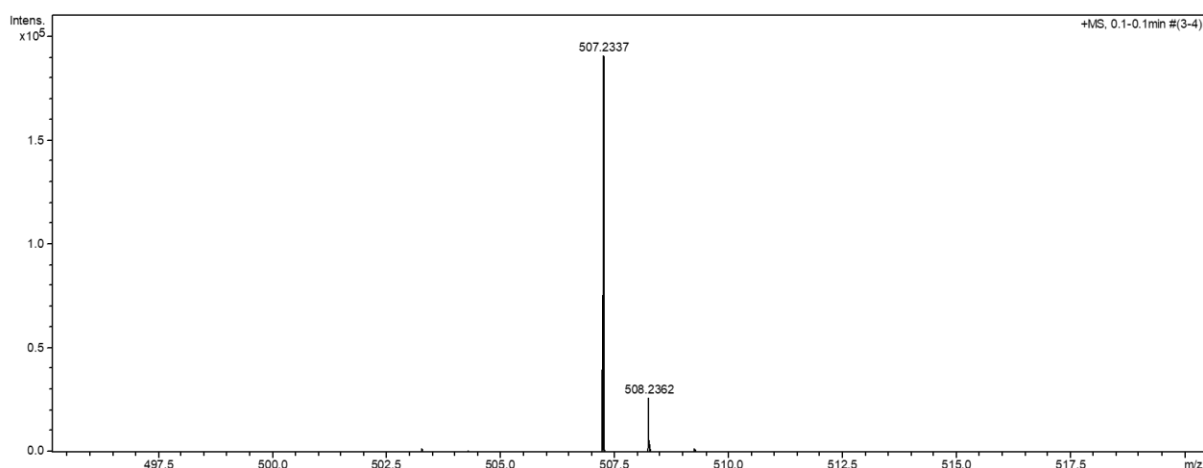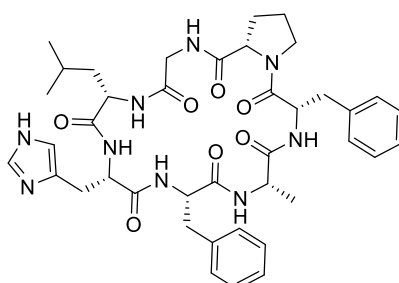

Segetalin C

### **Cyclo-[Gly-Leu-His-Phe-Ala-Phe-Pro] (segetalin C)**

**<sup>1</sup>H NMR (400 MHz, Pyridine-*d*<sub>5</sub>)** δ 10.26 (q, *J* = 3.8 Hz, 1H), 10.13 (d, *J* = 9.2 Hz, 1H), 9.42 (d, *J* = 3.8 Hz, 1H), 8.74 (d, *J* = 10.4 Hz, 1H), 8.65 (d, *J* = 5.3 Hz, 1H), 8.15 (s, 1H), 8.03 (d, *J* = 7.7 Hz, 1H), 7.56 (s, 1H), 7.51 (d, *J* = 7.3 Hz, 2H), 7.41-7.36 (m, 4H), 7.31 (t, *J* = 7.2 Hz, 2H), 7.26-7.22 (m, 2H), 7.20 (s, 1H), 5.41-5.29 (m, 1H), 5.13-5.07 (m, 1H), 5.00-4.88 (m, 3H), 4.40 (t, *J* = 7.8 Hz, 1H), 3.95 (dd, *J* = 15.1 Hz, 6.0 Hz, 1H), 3.86 (dd, *J* = 16.9 Hz, 3.8 Hz, 1H), 3.75 (dd, *J* = 15.0 Hz, 7.8 Hz, 1H), 3.57 (dd, *J* = 14.6 Hz, 4.8 Hz, 1H), 3.37 (dd, *J* = 14.5 Hz, 9.0 Hz, 1H), 3.22-3.16 (m, 1H), 3.13 (dd, *J* = 12.8 Hz, 3.5 Hz, 1H), 3.00-2.94 (m, 1H), 2.67 (q, *J* = 8.5 Hz, 1H), 1.96-1.81 (m, 5H), 1.79 (d, *J* = 7.4 Hz, 3H), 1.53-1.48 (m, 1H), 1.29-1.22 (m, 1H), 0.84 (d, *J* = 6.4 Hz, 3H), 0.76 (d, *J* = 6.4 Hz, 3H).

**<sup>13</sup>C NMR (100 MHz, pyridine-*d*<sub>5</sub>)** 174.53, 174.13, 173.59, 173.39, 173.05, 171.26, 171.17, 139.28, 138.87, 137.55, 136.42, 131.39, 130.78, 130.20, 128.46, 128.38, 118.33, 63.47, 59.89, 55.47, 55.13, 50.75, 49.31, 45.15, 45.07, 40.34, 38.43, 30.89, 30.22, 26.18, 26.08, 24.12, 23.20, 19.57.

**HRMS (ESI)** C<sub>40</sub>H<sub>51</sub>N<sub>9</sub>O<sub>7</sub> [M+H]<sup>+</sup> calcd:770.3985, found:770.3904.

## Analytical HPLC of segetalin C

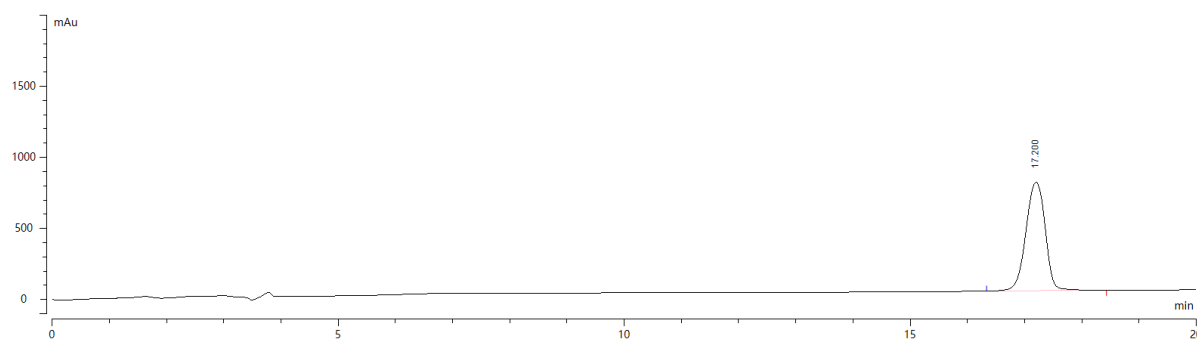

| Compound    | Ret. time (min) | Area (mAu*s) | Area (%) | Height (mAU) |
|-------------|-----------------|--------------|----------|--------------|
| Segetalin C | 17.200          | 17899.057    | 100.000  | 763.047      |

## High-resolution MS of segetalin C

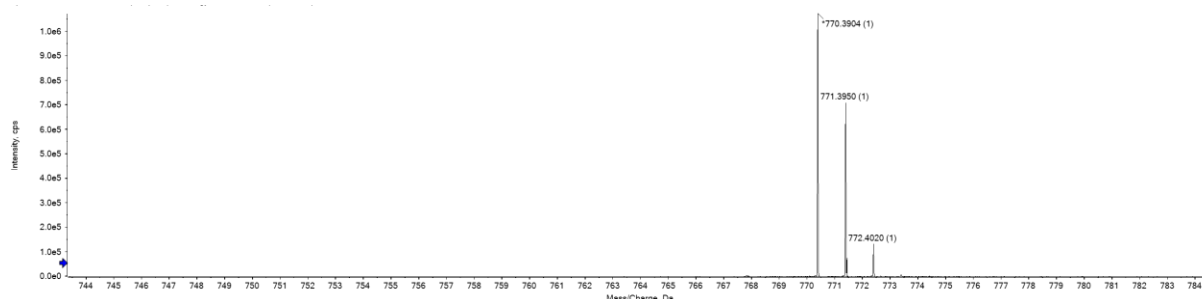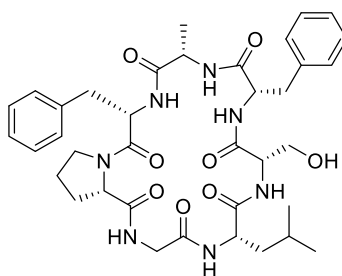

Segetalin D

## Cyclo-[Gly-Leu-Ser-Phe-Ala-Phe-Pro] (segetalin D)

**<sup>1</sup>H NMR (600 MHz, CD<sub>3</sub>CN)** δ 8.30 (d, *J* = 6.0 Hz, 1H), 8.04 (d, *J* = 10.2 Hz, 1H), 7.44 (s, 1H), 7.32-7.20 (m, 1H), 7.16 (s, 1H), 6.97 (d, *J* = 8.4 Hz, 1H), 4.82 (q, *J* = 8.4 Hz, 1H), 4.60-4.58 (m, 1H), 4.50-4.49 (m, 1H), 4.34-4.22 (m, 3H), 4.09 (t, *J* = 7.2 Hz, 1H), 4.05 (dd, *J* = 2.4 Hz, 11.4 Hz, 1H), 3.92 (d, *J* = 10.8 Hz, 1H), 3.50 (t, *J* = 10.2 Hz, 1H), 3.37 (dd, *J* = 3.6 Hz, 16.8 Hz, 1H), 3.10 (dd, *J* = 4.8 Hz, 14.4 Hz, 1H), 3.06-3.31 (m, 2H), 2.93-2.89 (m, 1H), 2.74 (dd, *J* = 6.6 Hz, 13.2 Hz, 1H), 2.13-2.10 (m, 1H), 1.87-1.85 (m, 1H), 1.82-1.77 (m, 2H), 1.68-1.58 (m, 3H), 1.11 (d, *J* = 7.1 Hz, 3H), 0.85 (d, *J* = 6.0 Hz, 3H), 0.80 (d, *J* = 6.0 Hz, 3H).

**$^{13}\text{C}$  NMR (150 MHz,  $\text{CD}_3\text{CN}$ )**  $\delta$  171.60, 171.49, 171.19, 170.43, 170.34, 169.46, 168.80, 136.61, 136.49, 129.21, 128.77, 128.20, 128.01, 126.58, 126.32, 62.23, 61.60, 56.77, 54.13, 52.62, 52.00, 48.97, 47.50, 42.42, 38.68, 35.68, 28.88, 24.23, 24.10, 21.82, 20.67, 17.34. **HRMS (ESI)**  $\text{C}_{37}\text{H}_{49}\text{N}_7\text{O}_8$   $[\text{M}+\text{H}]^+$  calcd:720.3716, found:720.3659.

Analytical HPLC of segetalin D

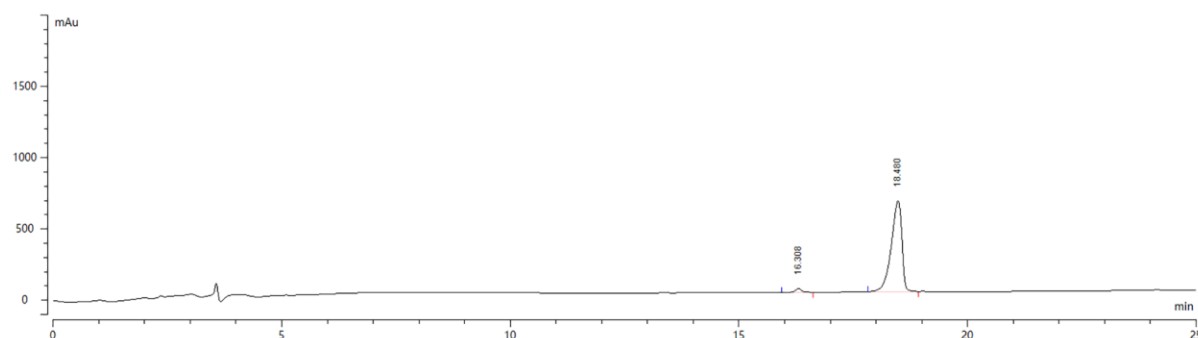

| Compound    | Ret. time (min) | Area (mAu*s) | Area (%) | Height (mAU) |
|-------------|-----------------|--------------|----------|--------------|
| N.A.        | 16.308          | 253.379      | 2.423    | 25.741       |
| Segetalin D | 18.480          | 10203.303    | 97.577   | 635.409      |

High-resolution MS of segetalin D

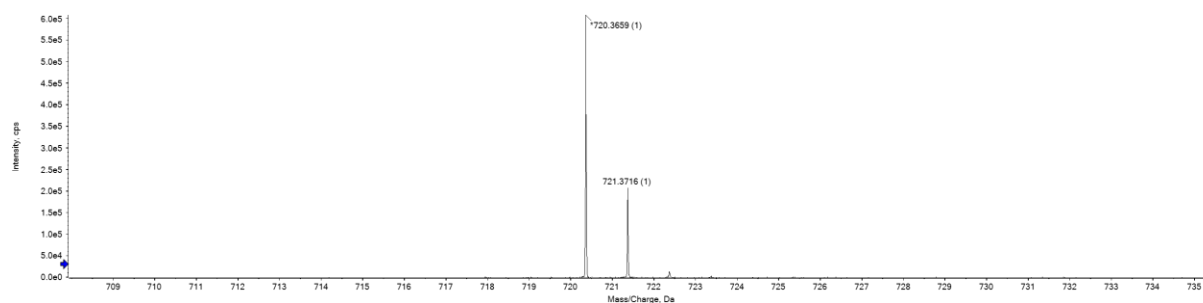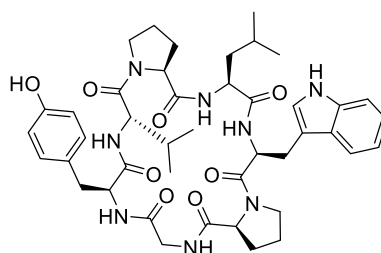

**Segetalin E**

**Cyclo-[ Gly-Tyr-Val-Pro-Leu-Trp-Pro ] (segetalin E)**

**$^1\text{H}$  NMR (600 MHz,  $\text{CD}_3\text{OD}$ )**  $\delta$  8.41 (t,  $J$  = 4.8 Hz, 1H), 7.79 (d,  $J$  = 6.0 Hz, 1H), 7.68 (d,  $J$  = 7.8 Hz, 1H), 7.45 (d,  $J$  = 7.8 Hz, 1H), 7.35 (d,  $J$  = 7.8 Hz, 1H), 7.27-7.26 (m, 2H), 7.13-7.10 (m, 1H), 7.08-7.05 (m, 1H), 7.03-7.01 (m, 1H), 6.98 (d,  $J$  = 7.8 Hz, 1H), 6.73 (d,  $J$  = 8.4 Hz, 1H), 6.62 (d,  $J$  = 8.4

Hz, 1H), 5.04 (t,  $J = 5.2$  Hz, 1H), 4.60-4.58 (m, 2H), 4.22-4.15 (m, 2H), 3.95 (dd,  $J = 4.0$  Hz, 7.0Hz, 1H), 3.80 (t,  $J = 8.1$  Hz, 1H), 3.68 (q,  $J = 16.8$  Hz, 2H), 3.60-3.45 (m, 3H), 3.37 (t,  $J = 10.4$  Hz, 1H), 3.25 (dd,  $J = 5.3$  Hz, 14.9 Hz, 1H), 2.84-2.80 (m, 1H), 2.66 (dd,  $J = 3.5$  Hz, 13.7 Hz, 1H), 2.46-2.43 (m, 1H), 2.28-2.25 (m, 1H), 2.12-2.11 (m, 1H), 2.00-1.88 (m, 4H), 1.73-1.68 (m, 1H), 1.62-1.57 (m, 2H), 1.52-1.47 (m, 1H), 1.36-1.32 (m, 1H), 1.03 (d,  $J = 6.8$  Hz, 3H), 0.96 (d,  $J = 6.9$  Hz, 3H), 0.86 (d,  $J = 6.5$  Hz, 3H), 0.81 (d,  $J = 2.8$  Hz, 3H).  **$^{13}\text{C}$  NMR (150 MHz,  $\text{CD}_3\text{OD}$ )**  $\delta$  173.13, 172.98, 171.87, 171.66, 171.48, 171.31, 169.45, 155.27, 136.11, 129.93, 128.74, 127.94, 124.35, 121.00, 118.60, 117.90, 114.44, 111.07, 107.91, 62.53, 61.01, 58.73, 55.01, 54.53, 52.61, 46.02, 42.10, 39.83, 35.34, 30.56, 29.49, 28.51, 26.18, 25.34, 24.92, 21.94, 21.22, 19.81, 18.04, 17.54.

**HRMS (ESI)**  $\text{C}_{43}\text{H}_{56}\text{N}_8\text{O}_8$   $[\text{M}+\text{H}]^+$  calcd:813.4294, found:813.4247.

Analytical HPLC of segetalin E

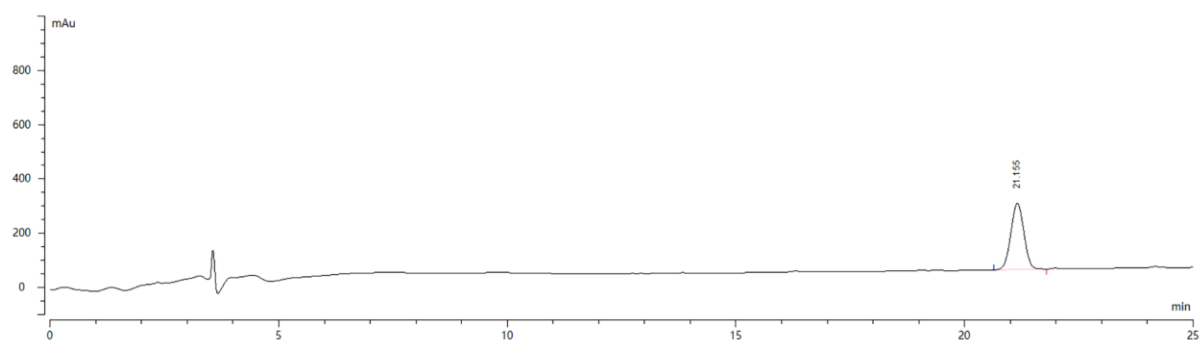

| Compound    | Ret. time (min) | Area (mAu*s) | Area (%) | Height (mAU) |
|-------------|-----------------|--------------|----------|--------------|
| Segetalin E | 21.155          | 4865.282     | 100.000  | 244.294      |

High-resolution MS of segetalin E

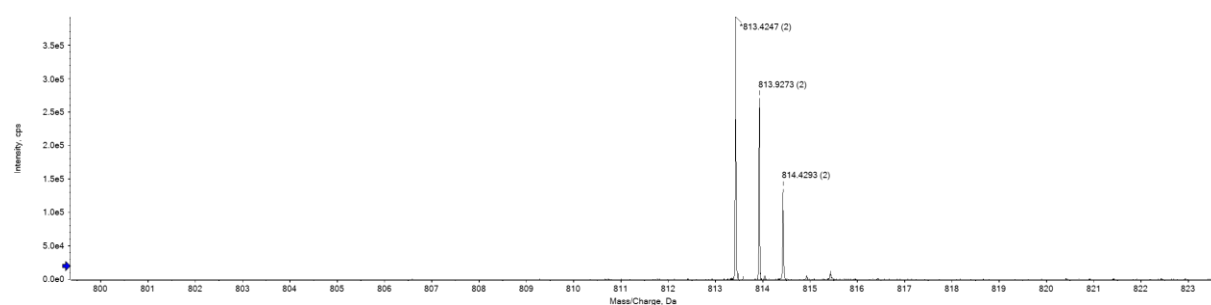

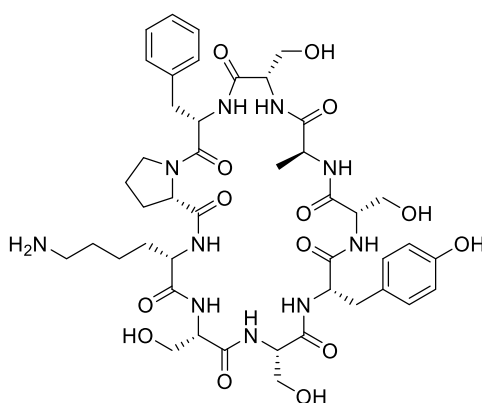

**Segetalin F**

***Cyclo*[Tyr-Ser-Ser-Lys-Pro-Phe-Ser-Ala-Ser] (segetalin F)**

**<sup>1</sup>H NMR (400 MHz, D<sub>2</sub>O)** δ 7.19 (d, *J* = 7.2 Hz, 2H), 7.16 (d, *J* = 6.8 Hz, 1H), 7.10-7.08 (m, 2H), 6.95 (d, *J* = 8.6 Hz, 2H), 6.65 (d, *J* = 8.5 Hz, 1H), 4.50 (t, *J* = 12.2 Hz, 1H), 4.45-4.42 (m, 1H), 4.35-4.28 (m, 2H), 4.25-4.21 (m, 3H), 4.19-4.15 (m, 1H), 4.12 (q, *J* = 7.3 Hz, 1H), 3.75-3.70 (m, 2H), 3.67-3.56 (m, 2H), 3.28-3.16 (m, 2H), 2.97-2.80 (m, 7H), 2.32-2.22 (m, 1H), 1.91-1.82 (m, 3H), 1.64-1.53 (m, 1H), 1.54-1.48 (m, 2H), 1.31-1.25 (m, 2H), 1.21 (d, *J* = 7.2 Hz, 3H).

**<sup>13</sup>C NMR (100 MHz, D<sub>2</sub>O)** δ 175.40, 174.84, 172.96, 172.64, 171.45, 171.36, 171.32, 170.95, 169.38, 154.44, 135.92, 130.51, 129.07, 128.74, 127.75, 127.24, 115.41, 61.17, 60.95, 60.87, 59.45, 55.54, 55.40, 55.21, 55.16, 54.90, 52.63, 49.84, 49.73, 46.49, 39.16, 37.12, 36.97, 36.07, 35.79, 30.13, 29.99, 29.73, 26.31, 26.09, 23.66, 21.92, 21.83, 16.36.

**HRMS (ESI)** C<sub>35</sub>H<sub>53</sub>N<sub>9</sub>O<sub>13</sub> [M+H]<sup>+</sup> calcd:955.4513, found:955.4520.

Analytical HPLC of segetalin F

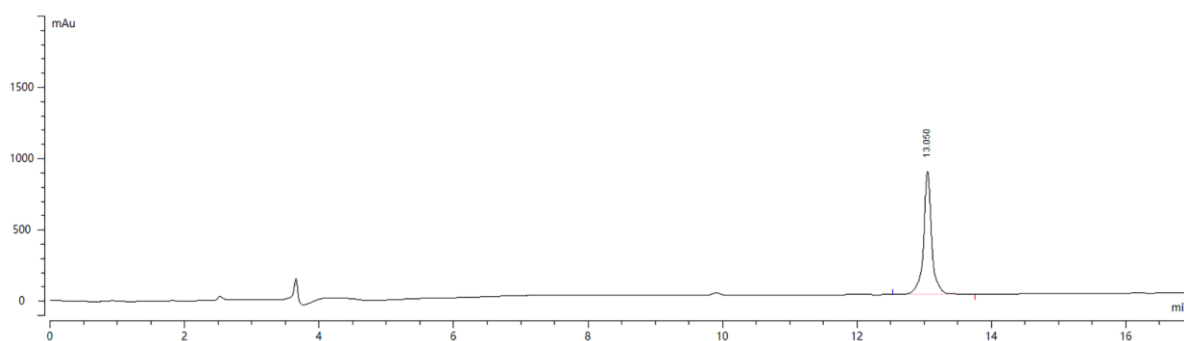

| Compound    | Ret. time (min) | Area (mAu*s) | Area (%) | Height (mAU) |
|-------------|-----------------|--------------|----------|--------------|
| Segetalin F | 8.677           | 5118.598     | 99.753   | 629.009      |
| N.A.        | 8.938           | 12.663       | 0.247    | 2.532        |

## High-resolution MS of segetalin F

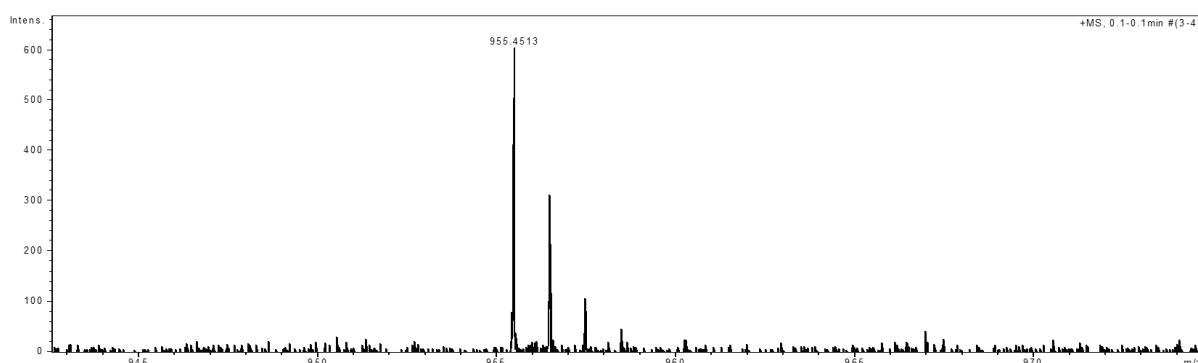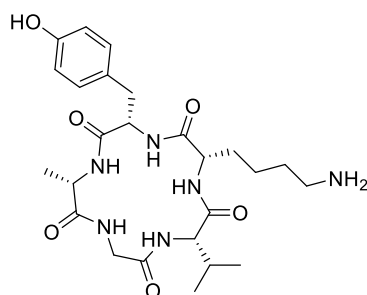

**Segetalin G**

### ***Cyclo*-[Gly-Val-Lys-Tyr-Ala] (segetalin G)**

**$^1\text{H}$  NMR (600 MHz,  $\text{D}_2\text{O}$ )**  $\delta$  8.29 (t,  $J$  = 5.1 Hz, 1H), 8.17 (dd,  $J$  = 8 Hz, 15.9 Hz, 2H), 7.93 (d,  $J$  = 8.6 Hz, 1H), 7.82 (s, 4H), 7.04 (d,  $J$  = 8.0 Hz, 2H), 6.73 (d,  $J$  = 7.9 Hz, 2H), 4.30 (q,  $J$  = 7.6 Hz, 2H), 4.13-4.10 (m, 2H), 3.98 (t,  $J$  = 8.0 Hz, 1H), 3.47 (dd,  $J$  = 4.8 Hz, 14.3 Hz, 1H), 3.00 (dd,  $J$  = 5.1 Hz, 13.5 Hz, 1H), 2.93-2.89 (m, 1H), 2.77-2.75 (m, 2H), 2.05-2.01 (m, 1H), 1.62-1.53 (m, 4H), 1.28 (d,  $J$  = 6.8 Hz, 3H), 1.19-1.17 (m, 1H), 1.04 (m, 1H), 0.93 (t,  $J$  = 7.7 Hz, 6H).  **$^{13}\text{C}$  NMR (150 MHz,  $\text{D}_2\text{O}$ )**  $\delta$  172.32, 171.20, 171.09, 170.97, 169.99, 156.54, 130.59, 128.10, 115.59, 60.87, 56.80, 54.68, 49.06, 43.66, 39.21, 36.63, 31.78, 30.24, 27.17, 22.90, 19.80, 18.95, 17.28.

**HRMS (ESI)**  $\text{C}_{25}\text{H}_{38}\text{N}_6\text{O}_6$   $[\text{M}+\text{H}]^+$  calcd: 519.2926, found: 519.2861.

## Analytical HPLC of segetalin G

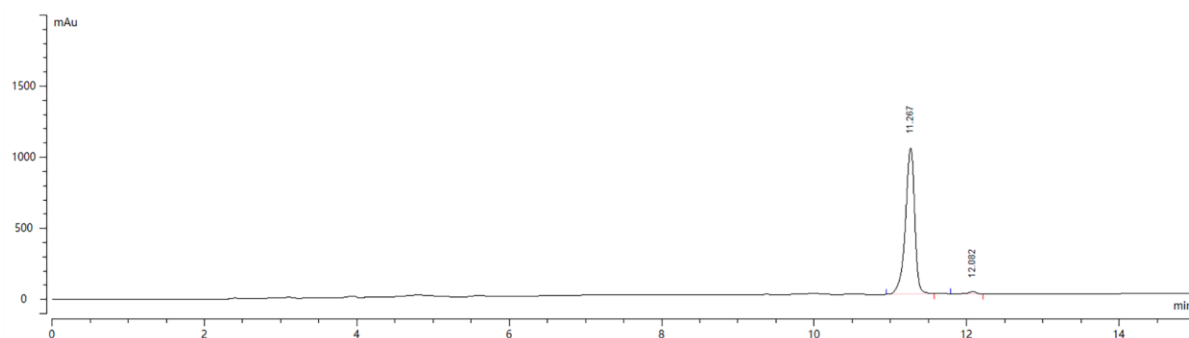

| Compound    | Ret. time (min) | Area (mAu*s) | Area (%) | Height (mAU) |
|-------------|-----------------|--------------|----------|--------------|
| Segetalin G | 13.050          | 7242.303     | 100.000  | 861.399      |

## High-resolution MS of segetalin G

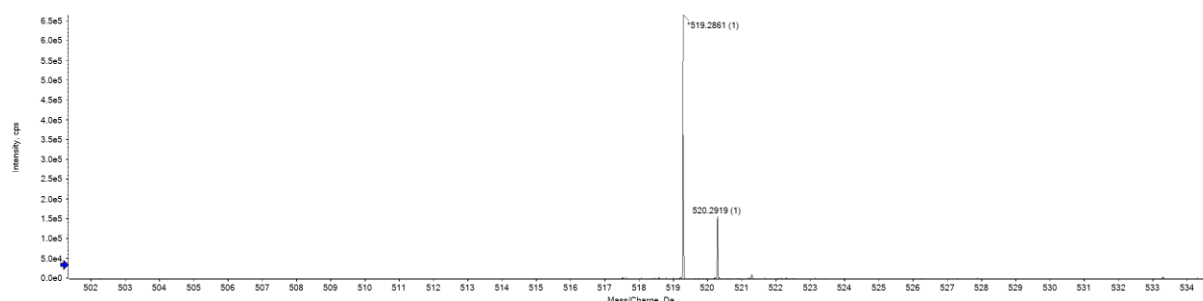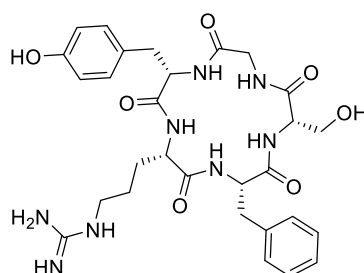

**Segetalin H**

## **Cyclo-[Gly-Tyr-Arg-Phe-Ser] (segetalin H)**

**<sup>1</sup>H NMR (600 MHz, D<sub>2</sub>O)** δ 8.45 (t, *J* = 5.14 Hz, 1H), 8.36 (d, *J* = 8.1 Hz, 1H), 8.13 (d, *J* = 8.2 Hz, 1H), 8.05 (d, *J* = 8.2 Hz, 1H), 7.84 (d, *J* = 8.3 Hz, 1H), 7.69 (s, 1H), 7.28 (t, *J* = 7.7 Hz, 2H), 7.22-7.19 (m, 3H), 7.02 (d, *J* = 8.3 Hz, 3H), 6.67 (d, *J* = 8.3 Hz, 2H), 4.28-4.17 (m, 3H), 4.04 (q, *J* = 7.8 Hz, 1H), 3.85 (dd, *J* = 6.2 Hz, 14.5 Hz, 1H), 3.68-3.65 (m, 1H), 3.61-3.58 (m, 1H), 3.43 (dd, *J* = 5.3 Hz, 14.0 Hz, 1H), 3.09 (d, *J* = 7.9 Hz, 2H), 3.06-3.01 (m, 2H), 2.93 (dd, *J* = 3.3 Hz, 14.0 Hz, 1H), 2.74 (dd, *J* = 9.8 Hz, 13.7 Hz, 1H), 1.57 (dd, *J* = 7.5 Hz, 15.0 Hz, 2H), 1.31-1.27 (m, 1H), 1.17-1.12 (m, 1H).



**$^{13}\text{C}$  NMR (150 MHz,  $\text{D}_2\text{O}$ )**  $\delta$  171.55, 171.48, 171.44, 171.17, 169.71, 157.36, 156.51, 138.12, 130.38, 129.65, 128.84, 128.14, 127.04, 115.67, 61.31, 57.66, 56.74, 55.74, 54.33, 43.71, 40.87, 36.90, 36.75, 29.12, 25.56.

**HRMS (ESI)**  $\text{C}_{29}\text{H}_{38}\text{N}_8\text{O}_7$   $[\text{M}+\text{H}]^+$  calcd:611.2937, found:611.2848.

Analytical HPLC of segetalin H

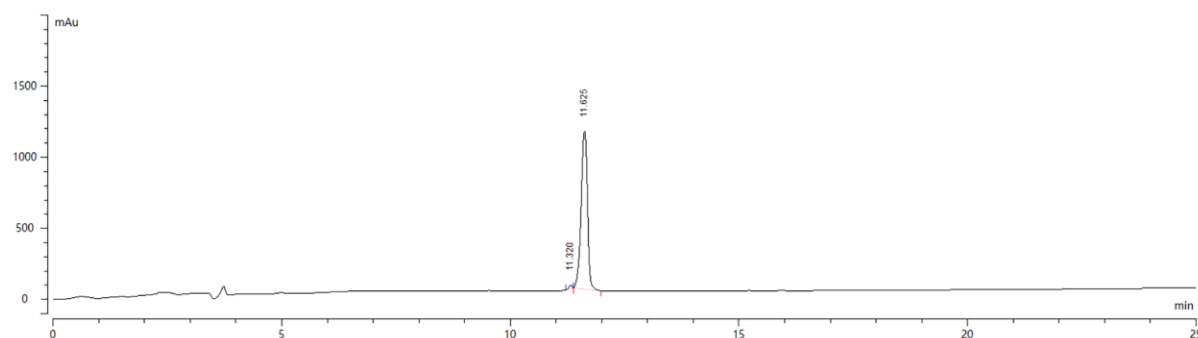

| Compound   | Ret. time (min) | Area (mAu*s) | Area (%) | Height (mAU) |
|------------|-----------------|--------------|----------|--------------|
| N.A.       | 11.320          | 109.096      | 1.007    | 23.984       |
| SegetalinH | 11.625          | 10727.998    | 98.993   | 1109.375     |

High-resolution MS of segetalin H

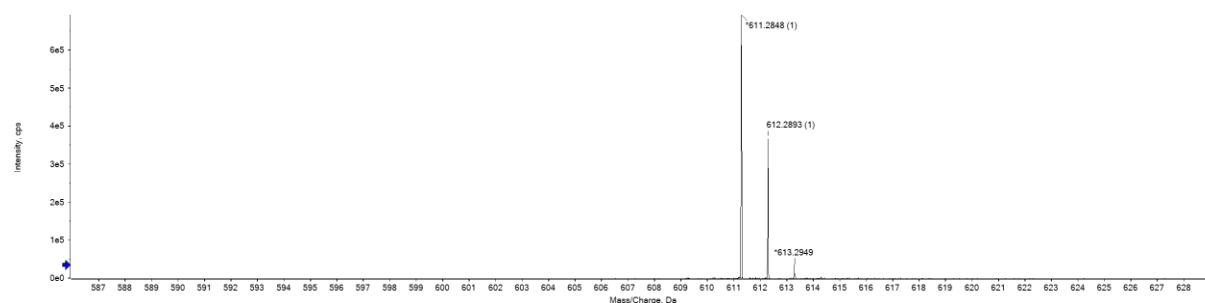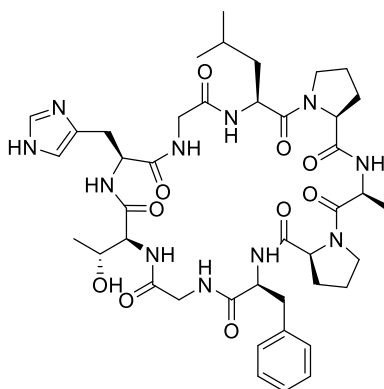

**Segetalin J**

**Cyclo-[Phe-Gly-Thr-His-Gly-Leu-Pro-Ala-Pro] (segetalin J)**

**$^1\text{H}$  NMR (600 MHz,  $\text{CD}_3\text{OD}$ )**  $\delta$  8.81 (d,  $J$  = 3.0 Hz, 1H), 8.63 (d,  $J$  = 12.0 Hz, 1H), 8.59 (d,  $J$  = 3.0 Hz, 1H), 8.47 (d,  $J$  = 6.0 Hz, 1H), 8.03 (t,  $J$  = 7.8 Hz, 1H), 7.68 (s, 1H), 7.45-7.43 (m, 2H), 7.32-

7.22 (m, 6H), 7.21-7.18 (m, 1H), 4.75-4.72 (m, 1H), 4.67-4.63 (m, 1H), 4.49-4.45 (m, 2H), 4.43 (d,  $J = 12.0$  Hz, 1H), 4.34 (dd,  $J = 4.2$  Hz, 9.6Hz, 1H), 4.26-4.25 (m, 1H), 4.20-4.16 (m, 1H), 4.14 (dd,  $J = 3.0$  Hz, 6.0Hz, 1H), 4.12-4.08 (m, 1H), 3.84-3.80 (m, 2H), 3.66-3.62 (m, 1H), 3.58 (dd,  $J = 4.2$  Hz, 15.6Hz, 1H), 3.54-3.50 (m, 1H), 3.34-3.33 (m, 1H), 3.27 (dd,  $J = 3.6$  Hz, 13.8 Hz, 1H), 3.21-3.17 (m, 2H), 2.36-2.31 (m, 1H), 2.22-2.16 (m, 2H), 2.13-2.02 (m, 3H), 1.98-1.91 (m, 2H), 1.79-1.74 (m, 1H), 1.61-1.55 (m, 2H), 1.33 (d,  $J = 7.2$  Hz, 3H), 1.20 (d,  $J = 6.0$  Hz, 3H), 0.92 (d,  $J = 6.6$  Hz, 3H), 0.79 (d,  $J = 6.6$  Hz, 3H).

**$^{13}\text{C}$  NMR (150 MHz,  $\text{CD}_3\text{OD}$ )**  $\delta$  173.85, 173.78, 173.39, 172.17, 171.59, 171.40, 171.00, 170.50, 170.17, 136.94, 133.45, 130.44, 128.57, 128.27, 126.64, 117.01, 67.03, 60.62, 59.41, 58.38, 56.17, 53.29, 49.53, 48.75, 46.49, 44.15, 42.57, 40.15, 36.56, 30.53, 29.43, 24.83, 24.58, 24.42, 22.30, 20.90, 19.71, 18.37, 14.25.

**HRMS (ESI)**  $\text{C}_{42}\text{H}_{59}\text{N}_{11}\text{O}_{10}$   $[\text{M}+\text{H}]^+$  calcd:878.4520, found:878.4408.

Analytical HPLC of segetalin J

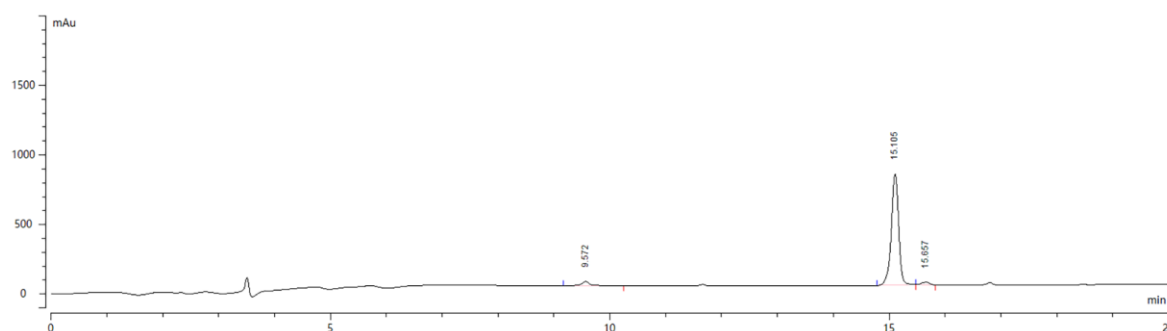

| Compound   | Ret. time (min) | Area (mAu*s) | Area (%) | Height (mAU) |
|------------|-----------------|--------------|----------|--------------|
| N.A.       | 9.572           | 298.115      | 3.845    | 29.937       |
| SegetalinJ | 15.105          | 7291.813     | 94.046   | 798.809      |
| N.A.       | 15.657          | 163.514      | 2.109    | 18.161       |

High-resolution MS of segetalin J

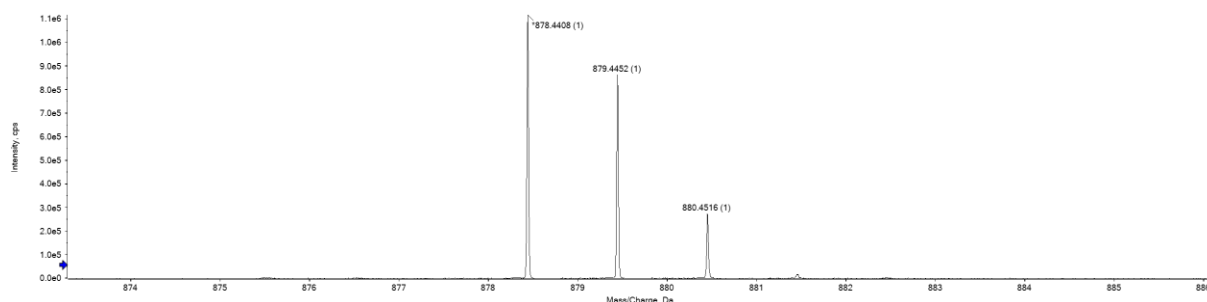

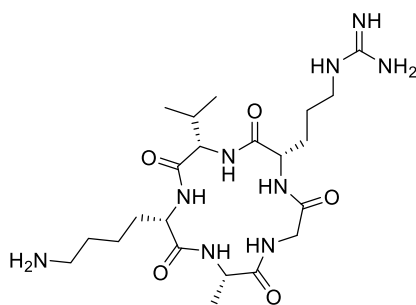

**Segetalin K**

### **Cyclo-[Gly-Arg-Val-Lys-Ala] (segetalin K)**

**<sup>1</sup>H NMR (600 MHz, D<sub>2</sub>O)** δ 4.13 (dd, *J* = 6.0 Hz, 12.0 Hz, 1H), 4.06 (dd, *J* = 6.0 Hz, 12.0 Hz, 1H), 3.97 (dd, *J* = 6.0 Hz, 9.6 Hz, 1H), 3.86-3.73 (m, 3H), 3.11-3.06 (m, 2H), 2.86-2.82 (m, 2H), 2.00-1.94 (m, 1H), 1.77-1.68 (m, 4H), 1.58-1.49 (m, 4H), 1.31-1.27 (m, 3H), 1.24 (d, *J* = 6.0 Hz, 3H), 0.81 (d, *J* = 4.4 Hz, 3H), 0.77 (d, *J* = 4.4 Hz, 3H).

**<sup>13</sup>C NMR (150 MHz, D<sub>2</sub>O)** δ 174.49, 174.09, 173.50, 173.36, 171.41, 156.68, 61.02, 55.01, 54.54, 50.03, 42.45, 40.28, 39.13, 29.44, 29.41, 27.05, 26.19, 24.54, 18.70, 17.99, 15.18. **HRMS (ESI)**

C<sub>22</sub>H<sub>41</sub>N<sub>9</sub>O<sub>5</sub> [M+H]<sup>+</sup> calcd:512.3304, found:512.3238.

Analytical HPLC of segetalin K

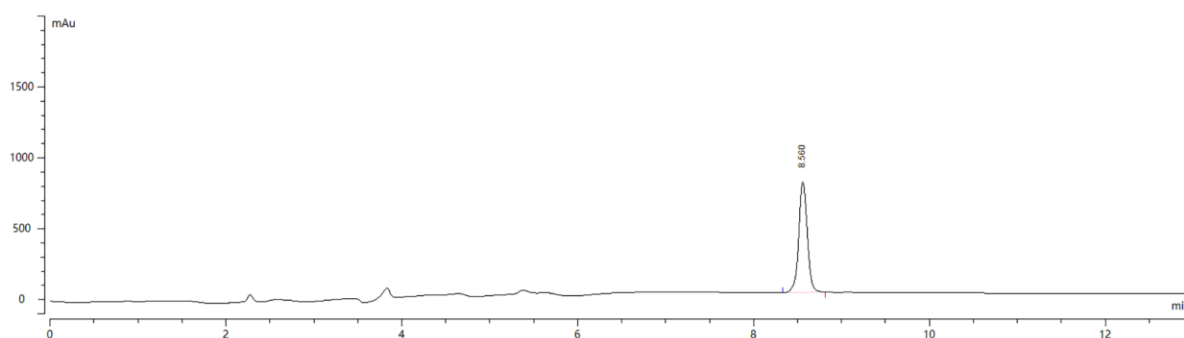

| Compound   | Ret. time (min) | Area (mAu*s) | Area (%) | Height (mAU) |
|------------|-----------------|--------------|----------|--------------|
| SegetalinK | 8.562           | 669.710      | 100.000  | 965.400      |

High-resolution Ms spectrum of segetalin K

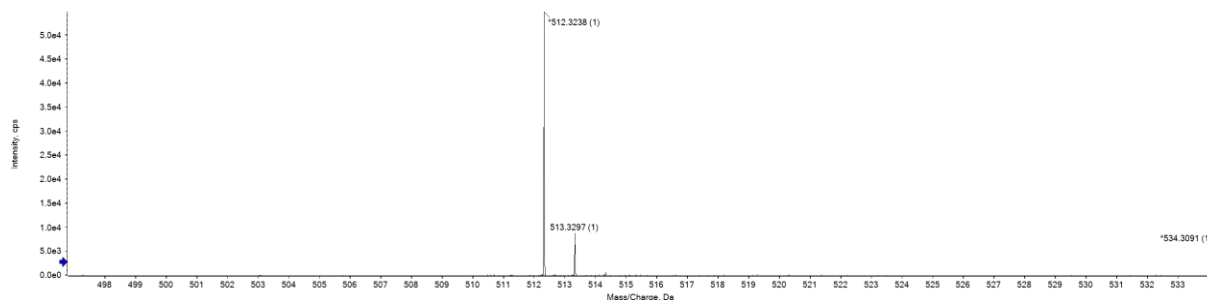

## 5. NMR spectra of products

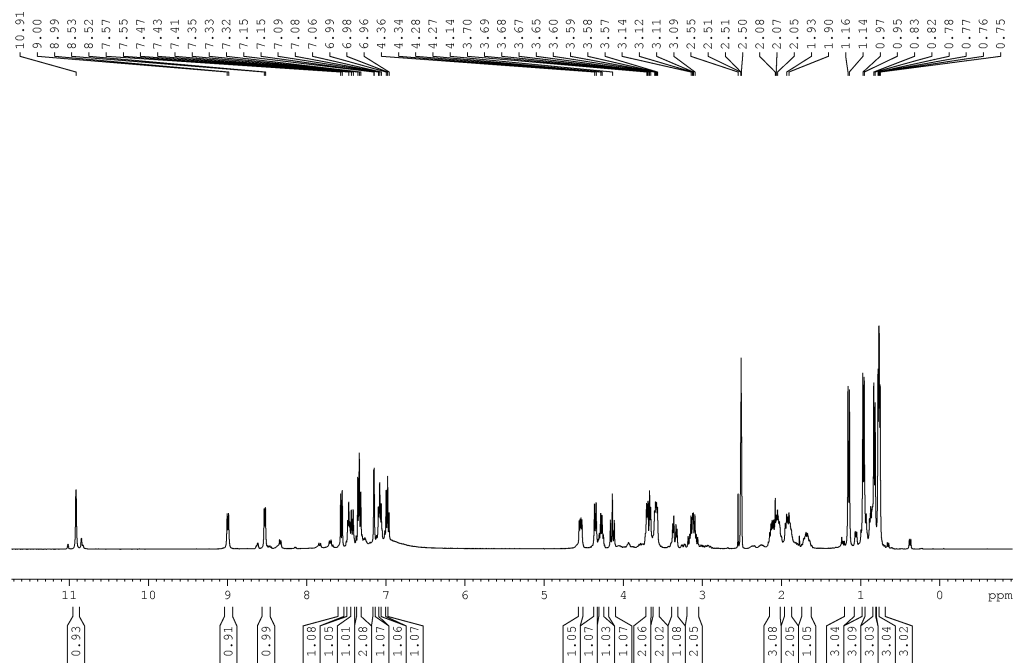

The <sup>1</sup>H NMR of **1** (DMSO-*d*<sub>6</sub>, 400 MHz)

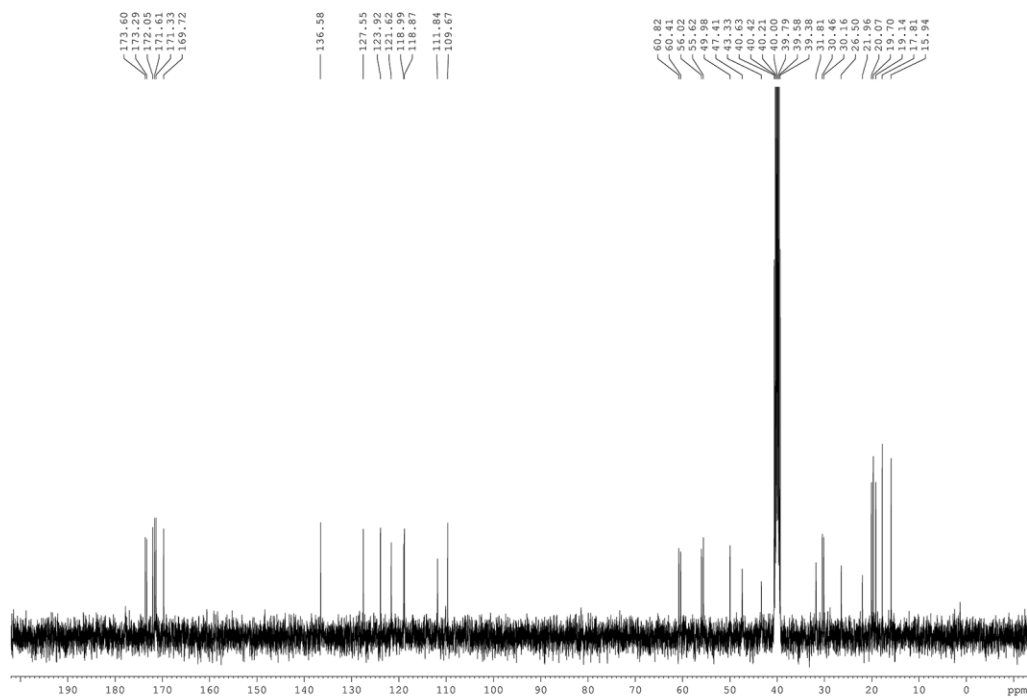

The <sup>13</sup>C NMR of **1** (DMSO-*d*<sub>6</sub>, 100 MHz)

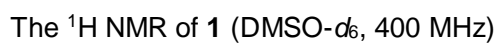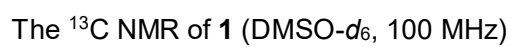

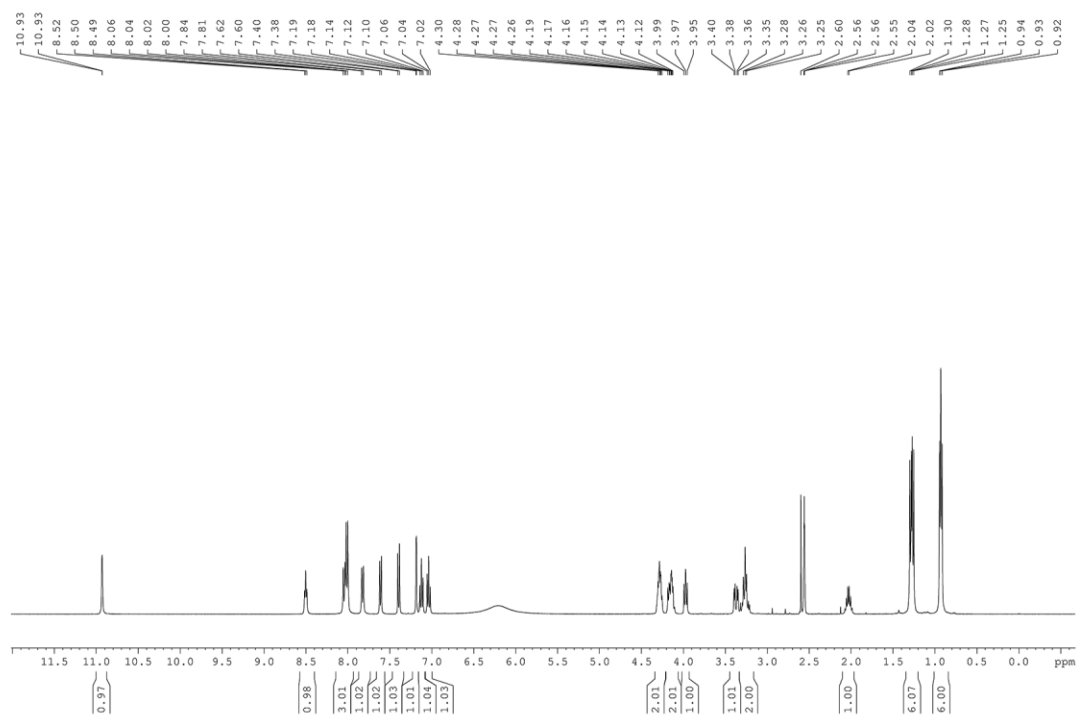

The <sup>1</sup>H NMR of **2** (DMSO-*d*<sub>6</sub>, 400 MHz)

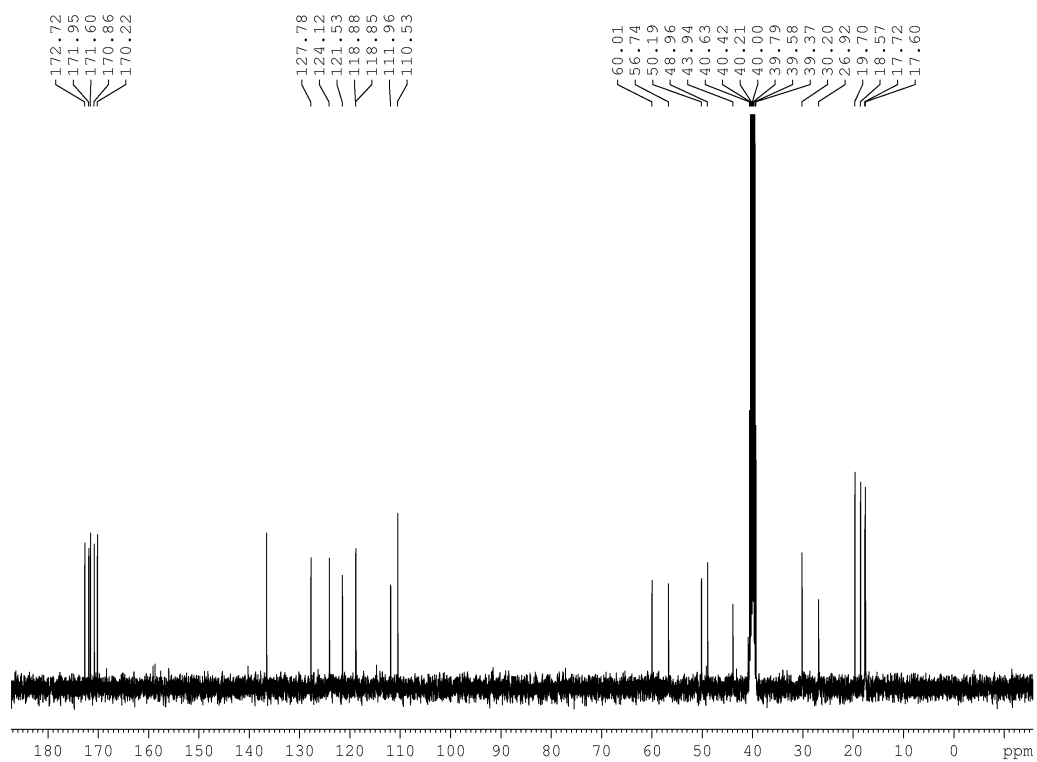

The <sup>13</sup>C NMR of **2** (DMSO-*d*<sub>6</sub>, 100 MHz)

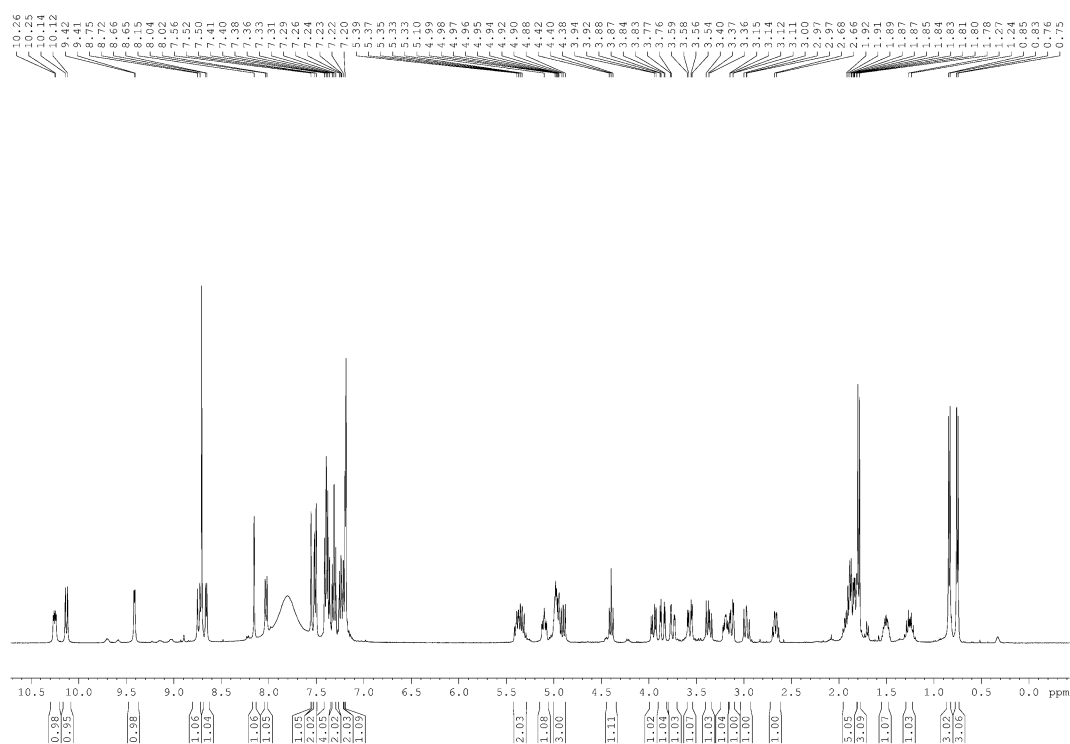

The <sup>1</sup>H NMR of **3** (pyridine-*d*<sub>5</sub>, 400 MHz)

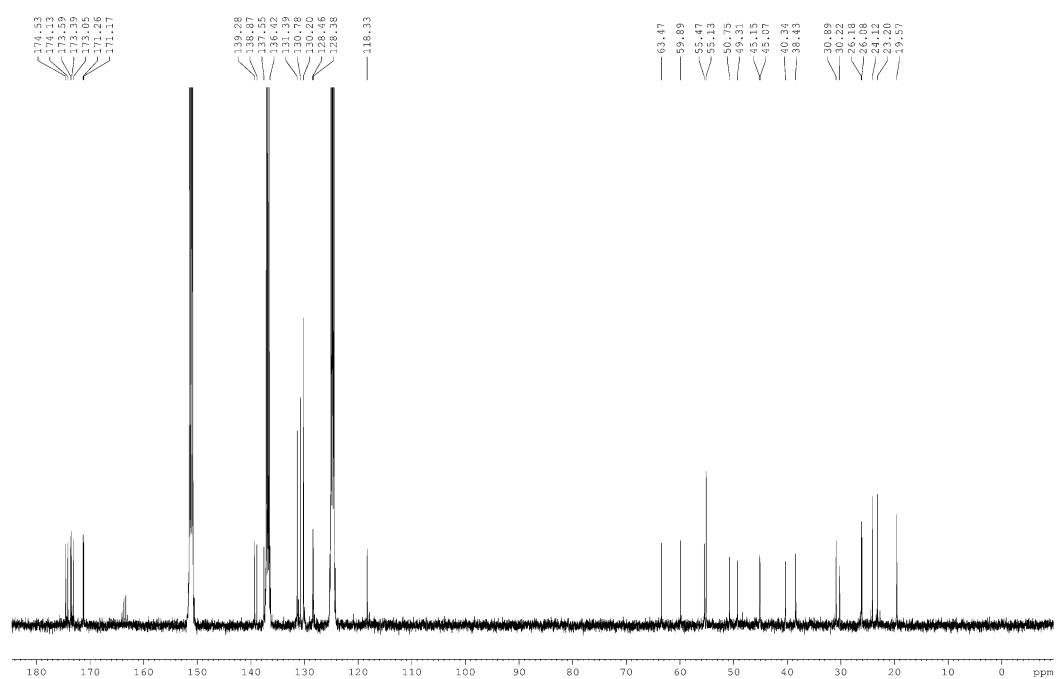

The <sup>13</sup>C NMR of **3** (pyridine-*d*<sub>5</sub>, 100 MHz)

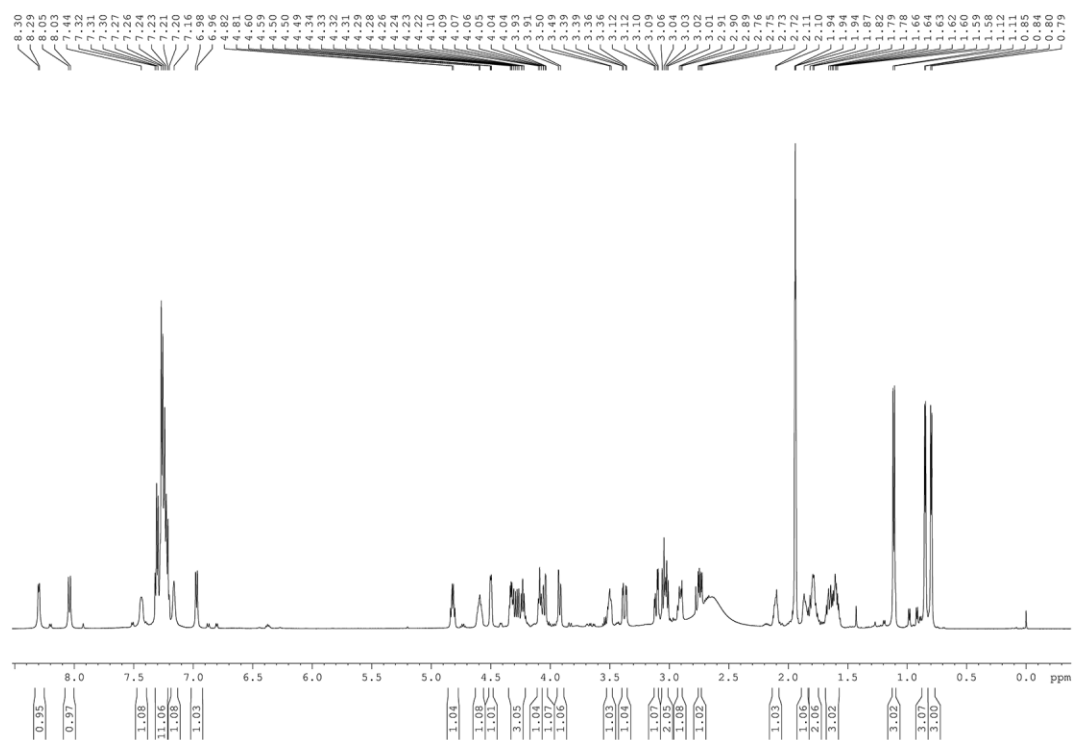

The <sup>1</sup>H NMR of **4** (CD<sub>3</sub>CN, 600 MHz)

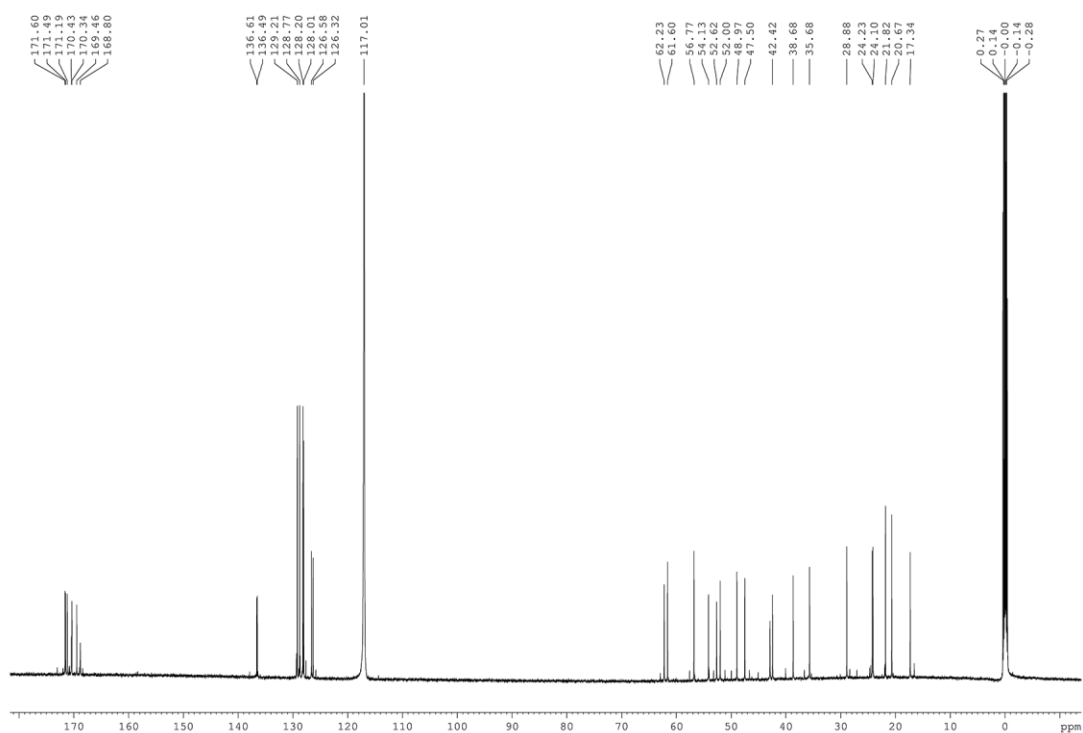

The <sup>13</sup>C NMR of **4** (CD<sub>3</sub>CN, 150 MHz)



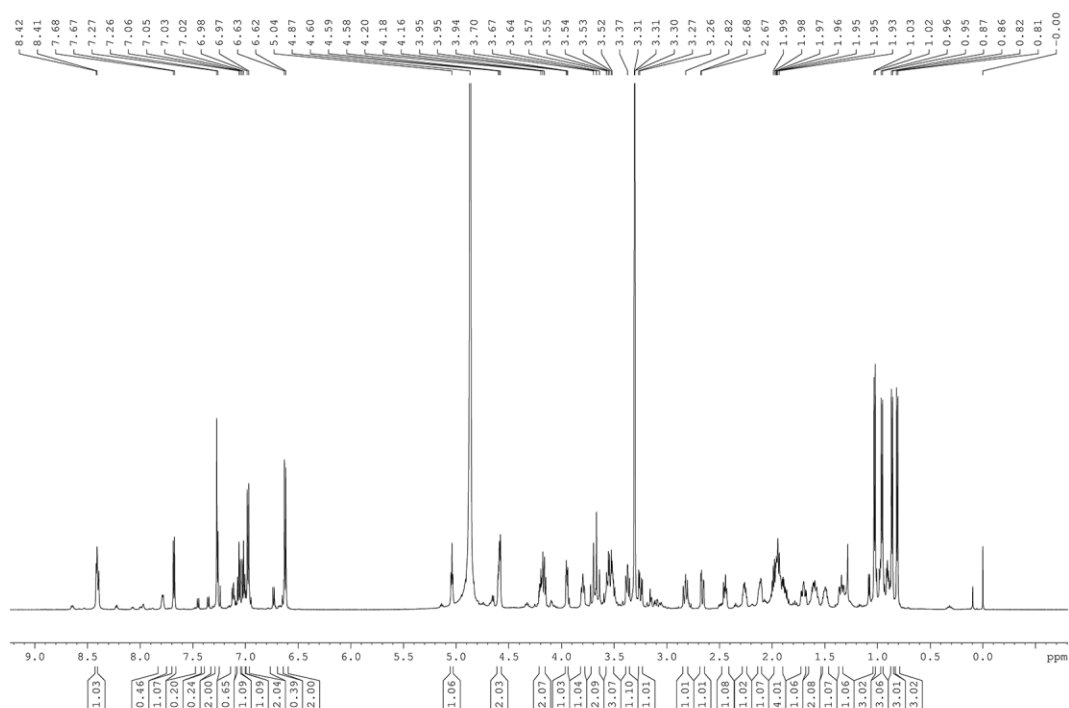

The <sup>1</sup>H NMR of **5** (CD<sub>3</sub>OD, 600 MHz)

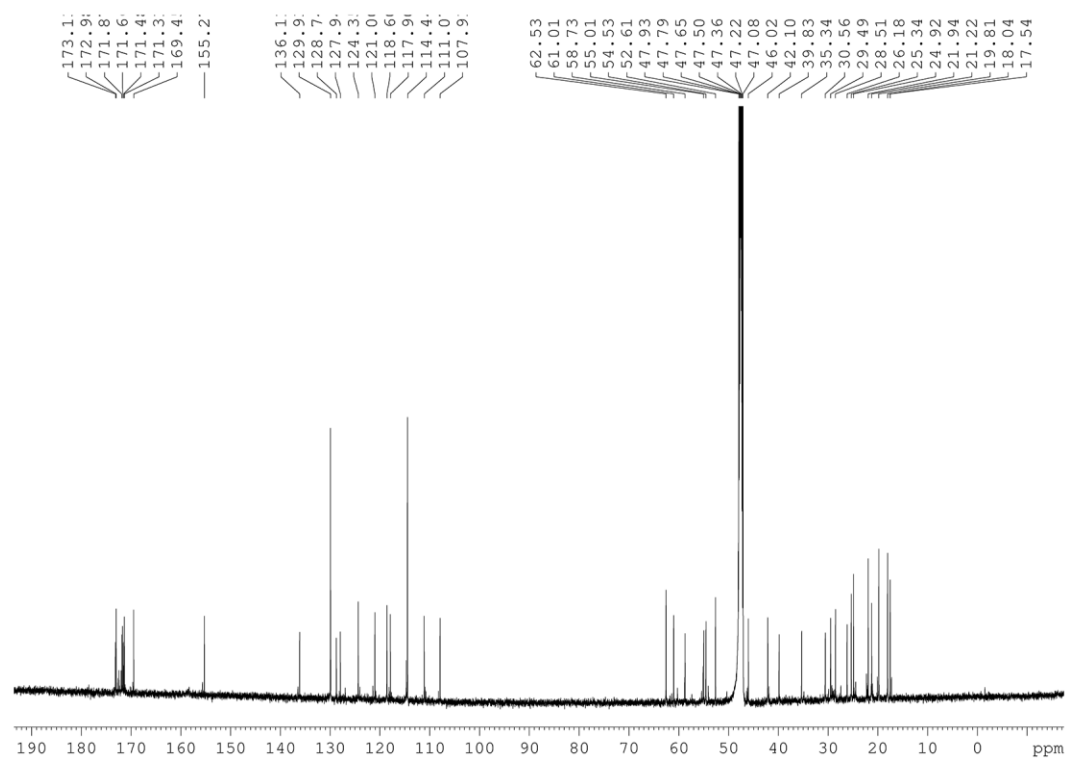

The <sup>13</sup>C NMR of **5** (CD<sub>3</sub>OD, 150 MHz)

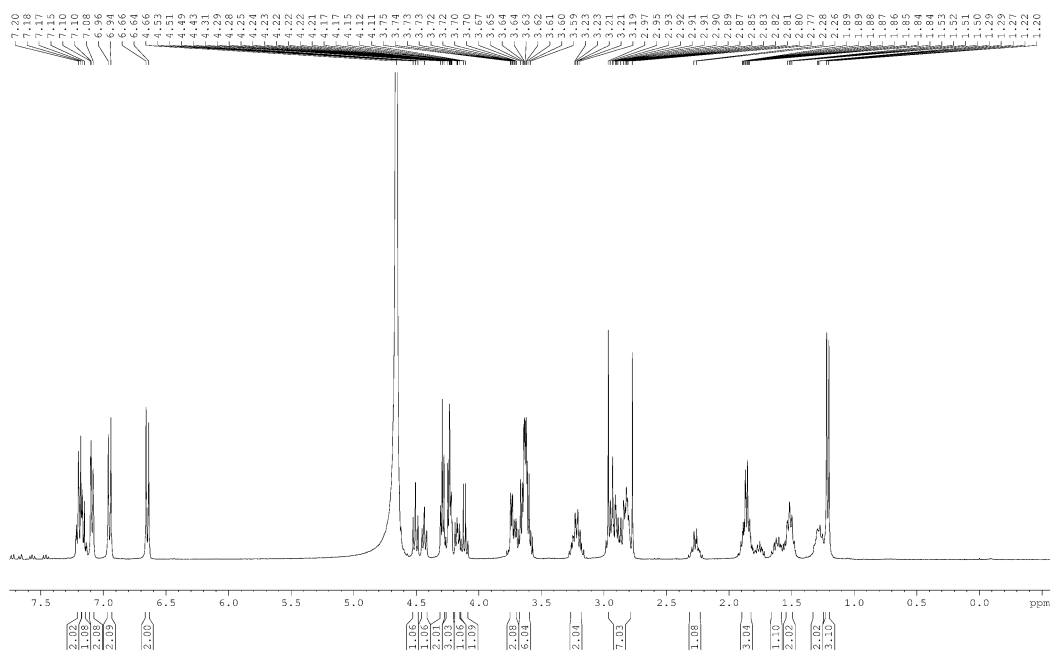

The <sup>1</sup>H NMR of **6** (D<sub>2</sub>O, 400 MHz)

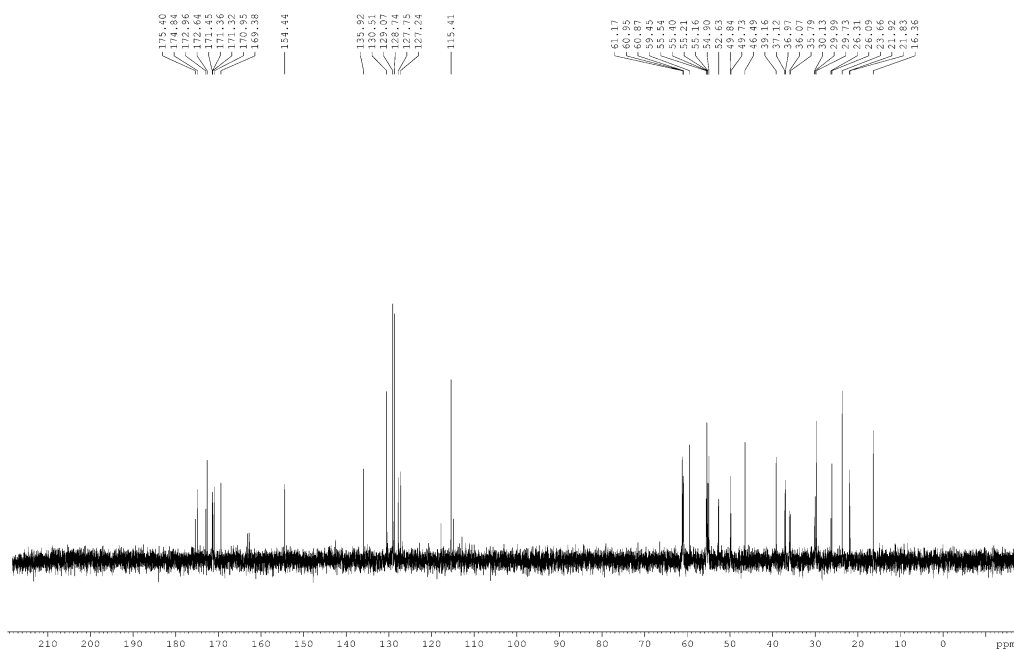

The <sup>13</sup>C NMR of **6** (D<sub>2</sub>O, 100 MHz)

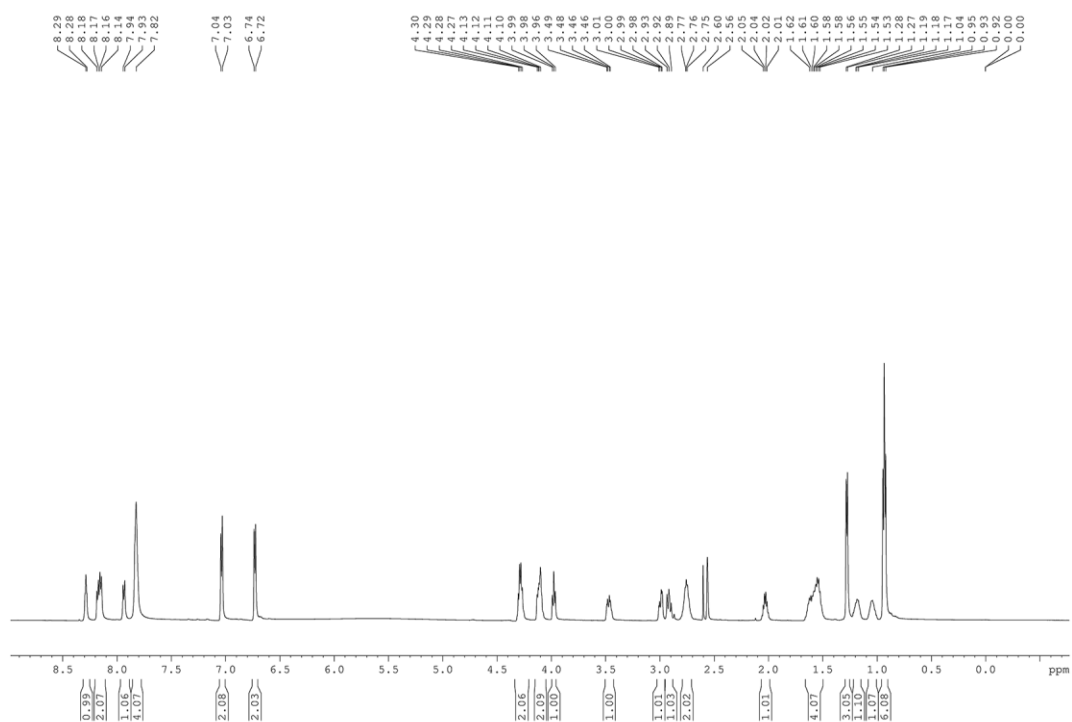

The <sup>1</sup>H NMR of **7** (D<sub>2</sub>O, 600 MHz)

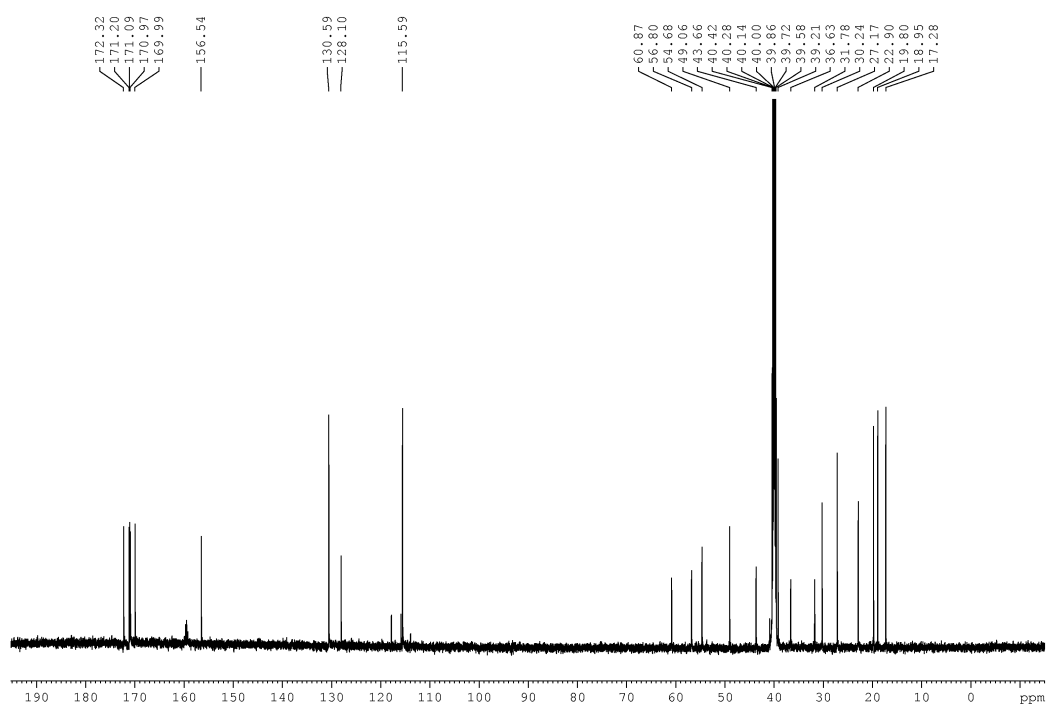

The <sup>13</sup>C NMR of **7** (D<sub>2</sub>O, 150 MHz)

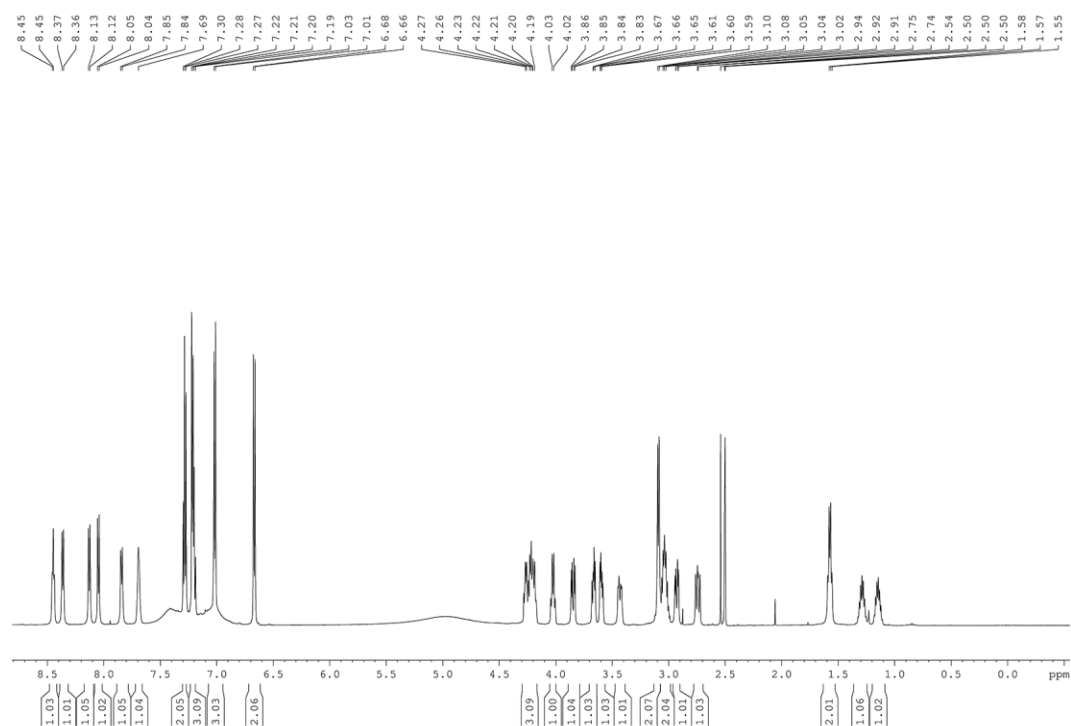

The <sup>1</sup>H NMR of **8** (D<sub>2</sub>O, 600 MHz)

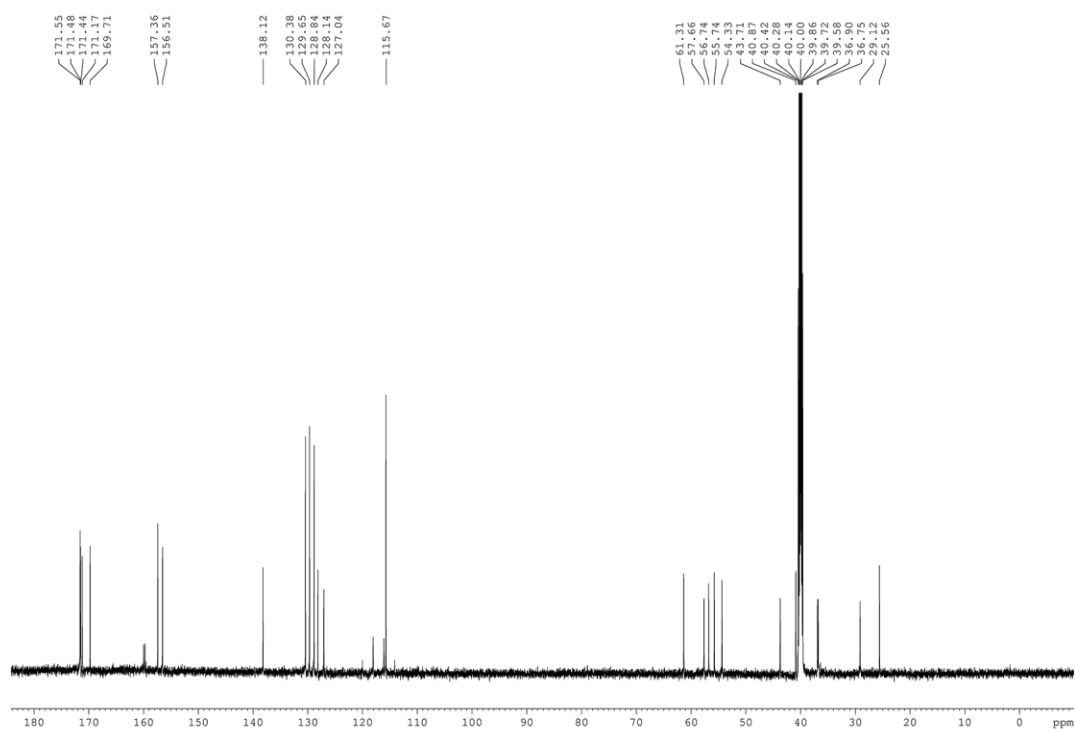

The <sup>13</sup>C NMR of **8** (D<sub>2</sub>O, 150 MHz)

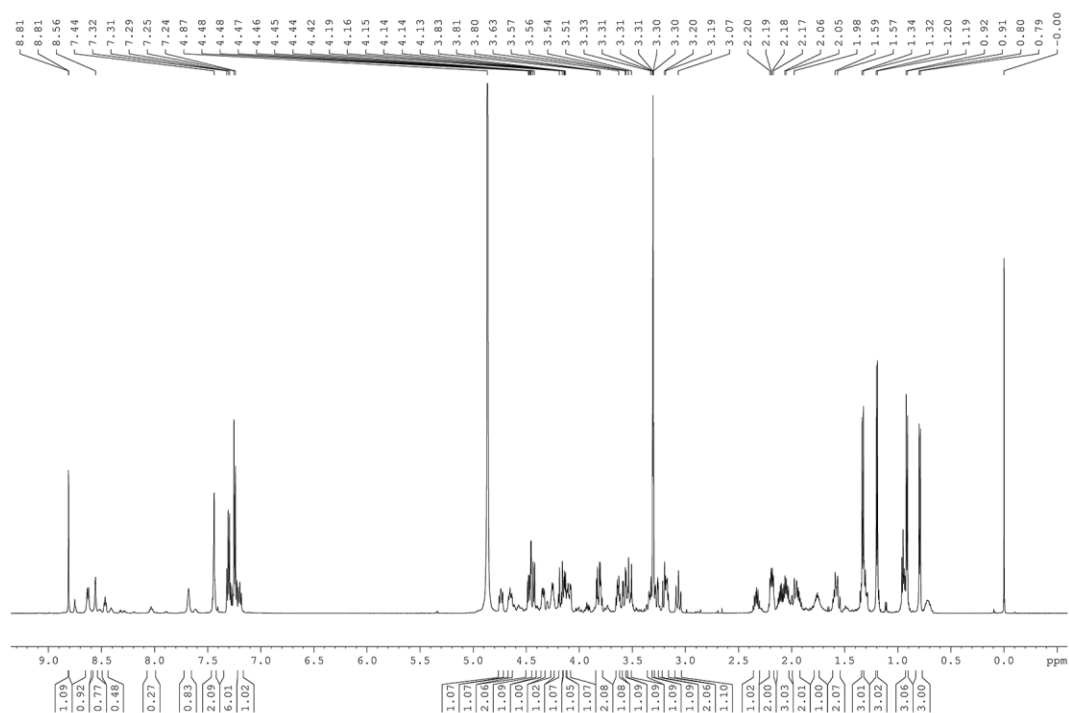

The <sup>1</sup>H NMR of **9** (CD<sub>3</sub>OD, 600 MHz)

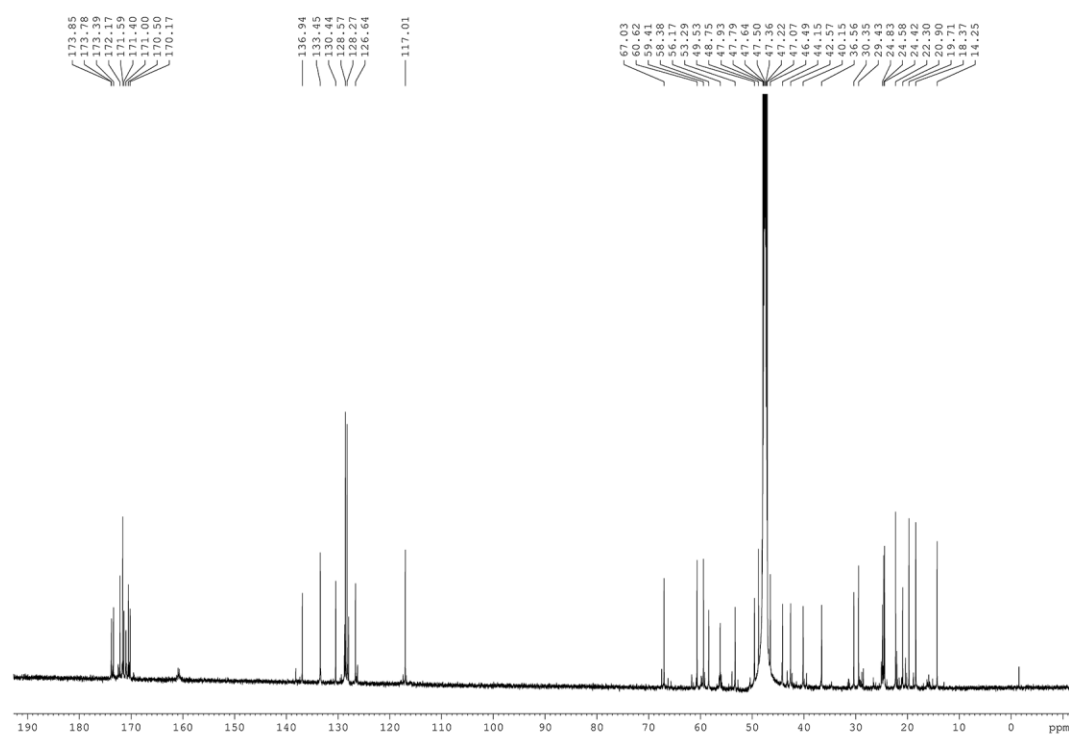

The <sup>13</sup>C NMR of **9** (CD<sub>3</sub>OD, 150 MHz)

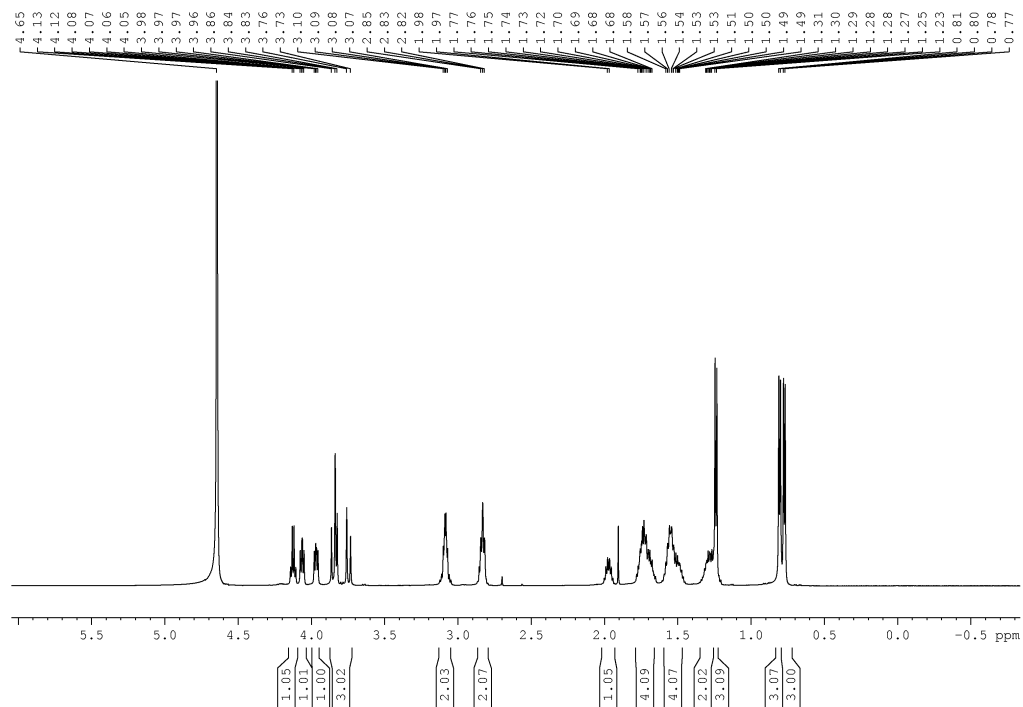

The  $^1\text{H}$  NMR of **10** ( $\text{D}_2\text{O}$ , 600 MHz)

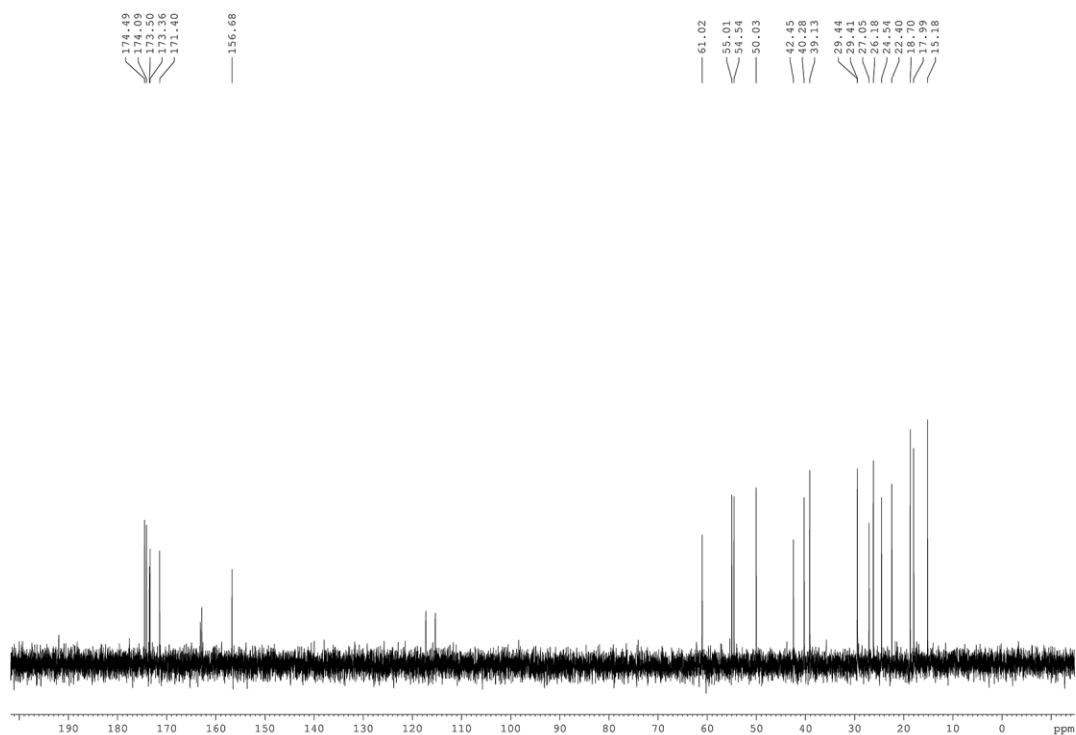

The  $^{13}\text{C}$  NMR of **10** ( $\text{D}_2\text{O}$ , 150 MHz)
